# Supplementary material for: Barnacles as biological flow indicators
Source: PeerJ journal article supplement (doi:10.7717/peerj.15018), 2023-04-18
Supplement: FigureS1.pdf [file FigureS1.pdf]

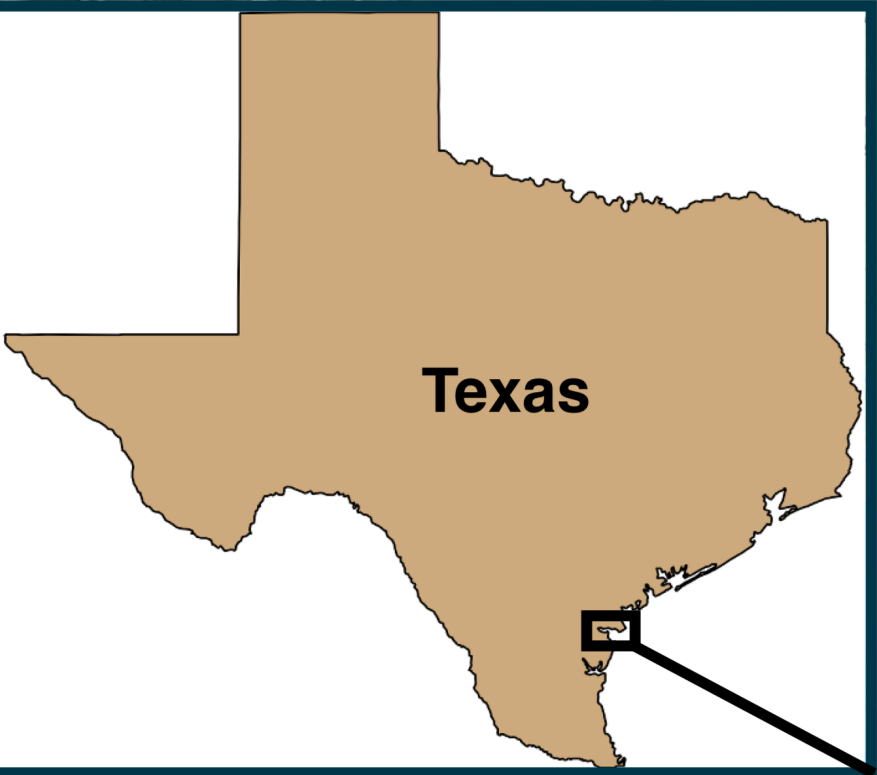

**Texas**

|                    | <b>Leeward</b>          | <b>Windward</b>         |
|--------------------|-------------------------|-------------------------|
| <b>Wave height</b> | 0.05 (m)                | 0.22 (m)                |
| <b>Velocity</b>    | 3.75 cm s <sup>-1</sup> | 6.68 cm s <sup>-1</sup> |
| <b>Turbulence</b>  | 3.355                   | 18.645                  |

Goose Island  
State Park

St. Charles Bay  
(Leeward)

Aransas Bay  
(Windward)

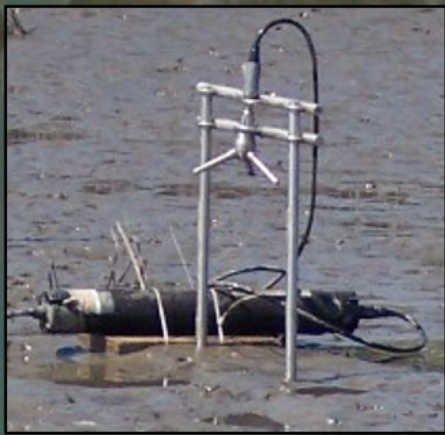

**Supplemental Figure 1: Map of Study area**
