# Supplementary material for: Barnacles as biological flow indicators
Source: PeerJ journal article supplement (doi:10.7717/peerj.15018), 2023-04-18
Supplement: FigureS2.pdf [file FigureS2.pdf]

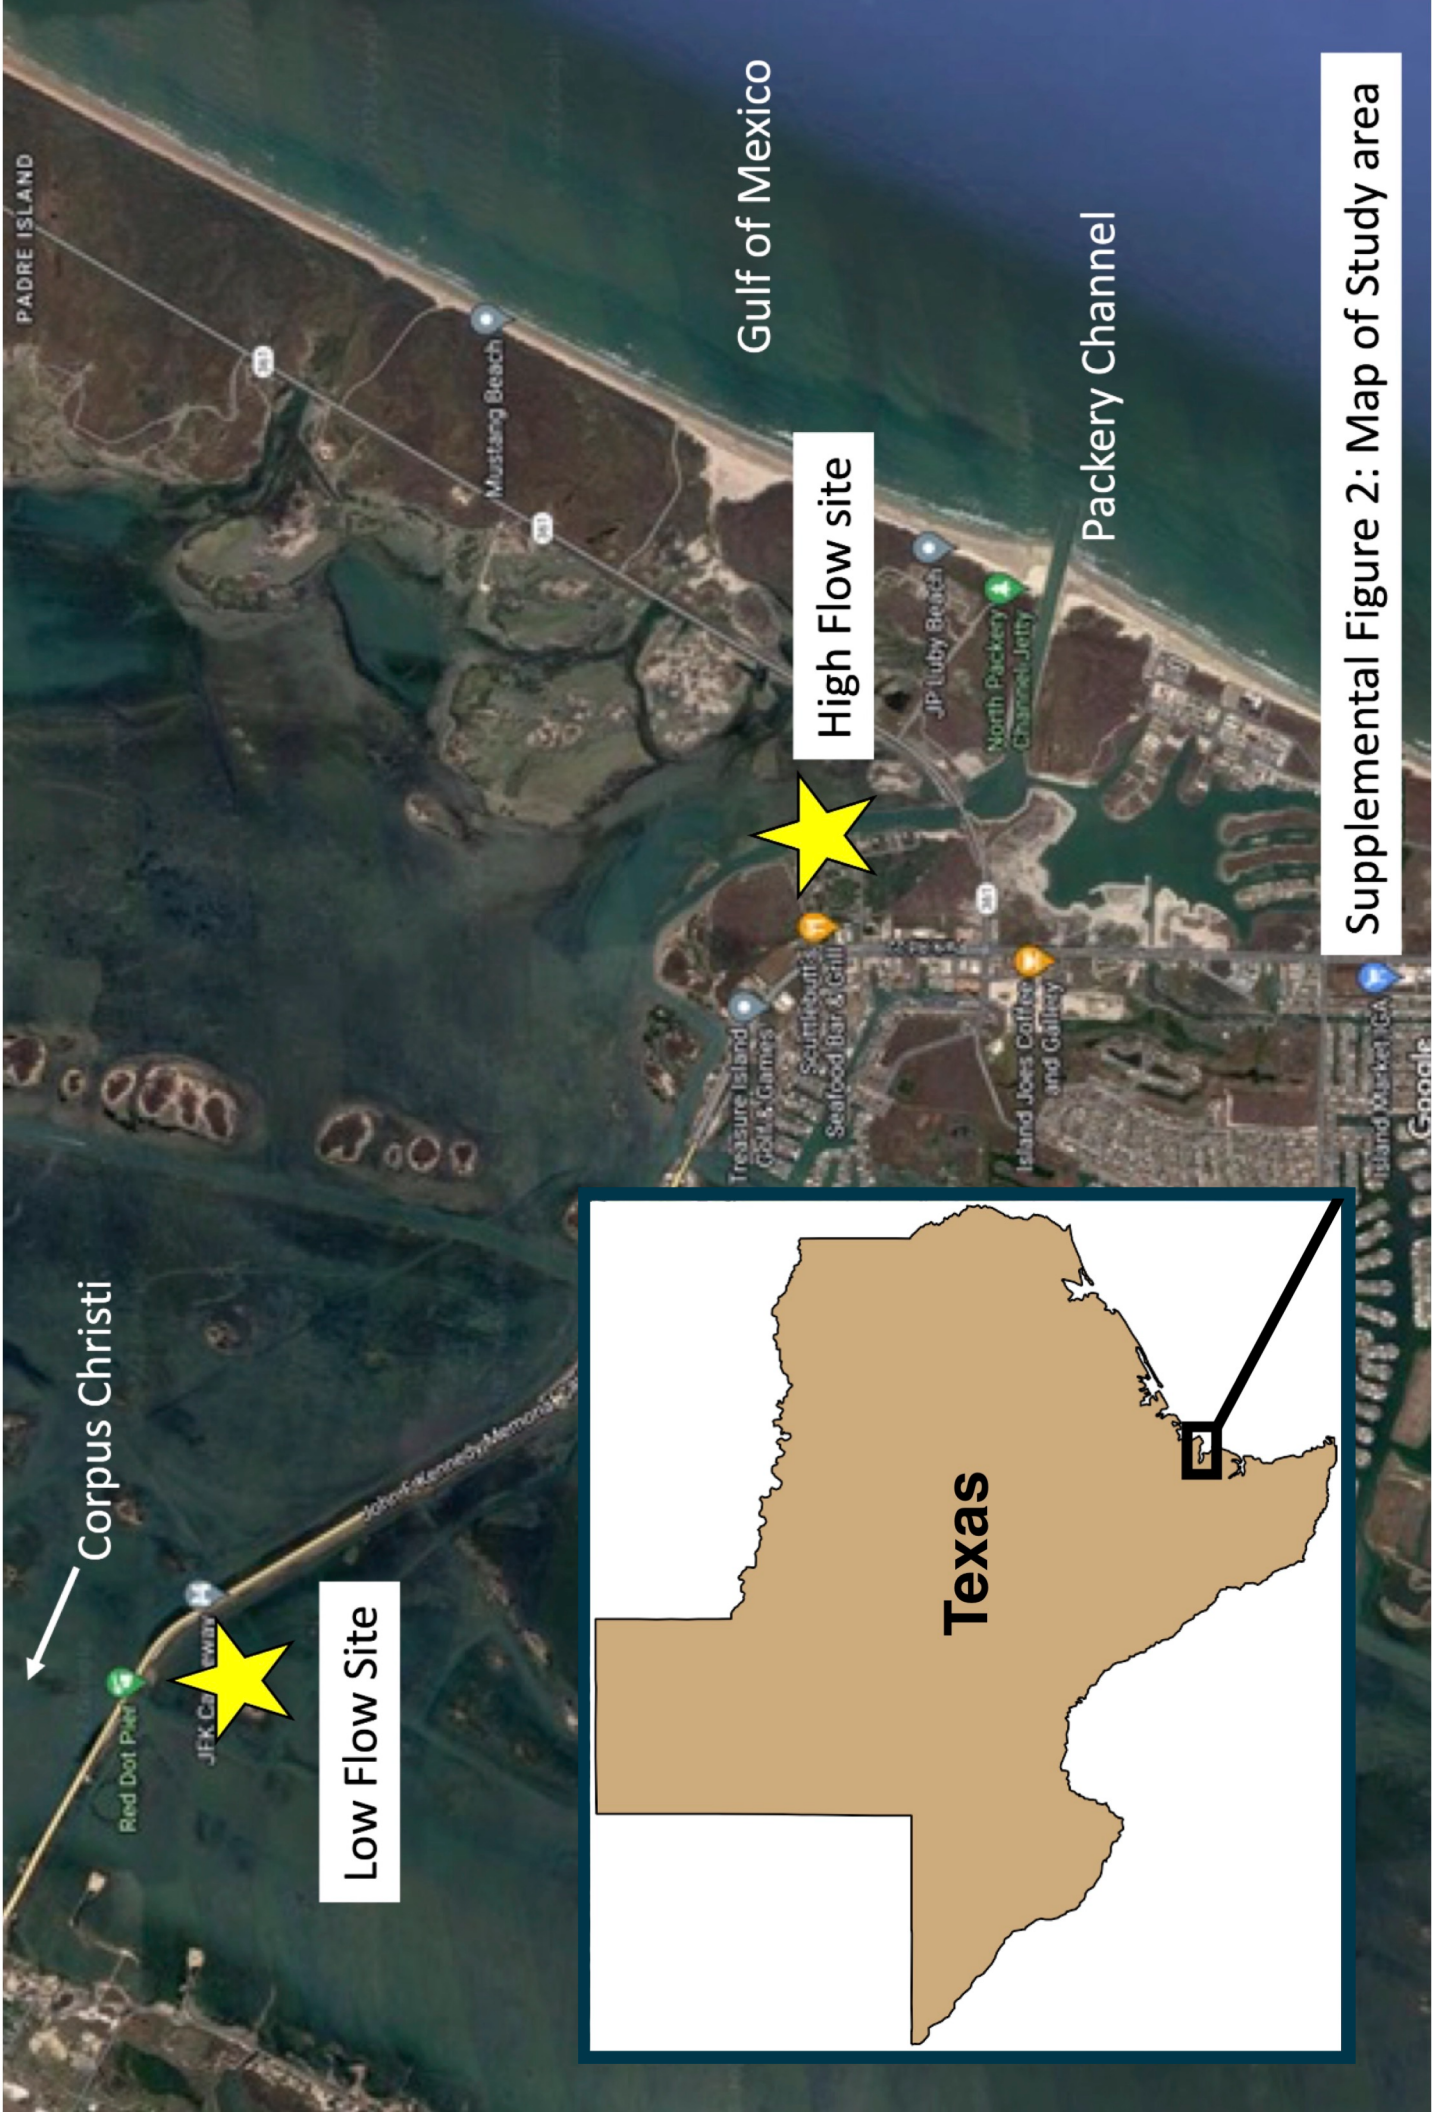

Corpus Christi

Gulf of Mexico

Packery Channel

High Flow site

Low Flow Site

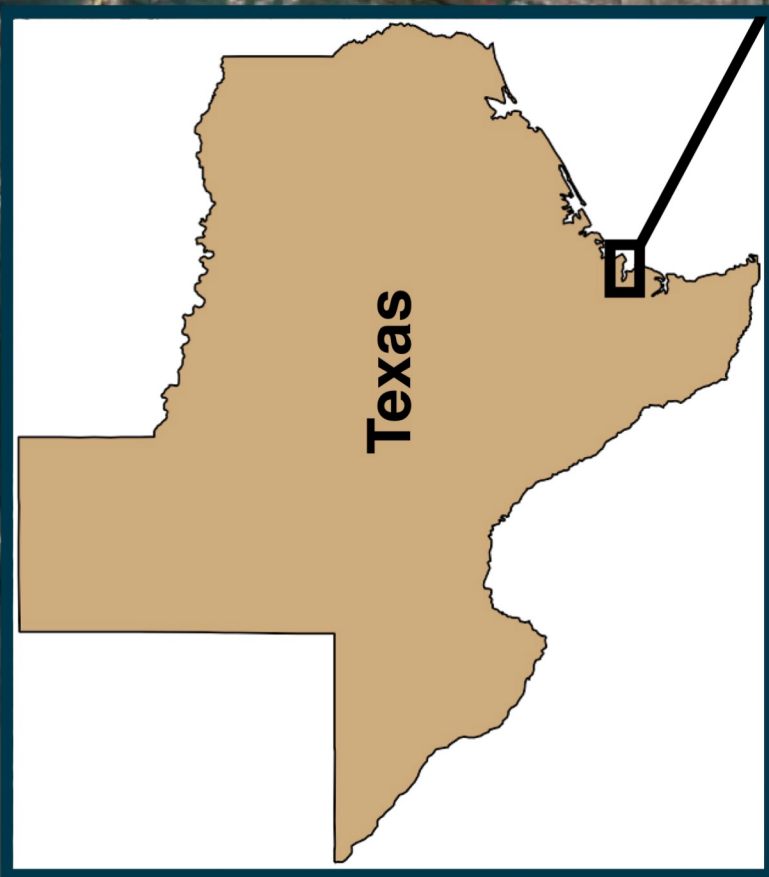

Texas

Supplemental Figure 2: Map of Study area
