# Supplementary material for: Barnacles as biological flow indicators
Source: PeerJ. 2023 Apr 18;11:e15018. doi: 10.7717/peerj.15018 (PMC10120587; doi:10.7717/peerj.15018)
Supplement: Supplemental Information 5 [file peerj-11-15018-s005.xlsx]

## Sheet: Sheet2
bd	side	color zip	scale(pix/mm)	cl	sl	rw	s_cl	s_sl	s_rw	pvc	id
20.39	lw_ww	blue	631	5.007	0.347	0.183	0.245562	0.0170181	0.00897499	1	b1
19.52	lw_ww	blue	631	8.157	0.511	0.25	0.417879	0.0261783	0.0128074	1	b2
19.34	lw_ww	blue	631	5.814	0.406	0.185	0.30062	0.0209928	0.00956567	1	b3
5.11	lw_ww	blue	631	2.154	0.159	0.11	0.421526	0.0311155	0.0215264	2	b4
10	lw_ww	blue	625.12	4.391	0.39	0.2	0.4391	0.039	0.02	2	b5
14.33	ww	orange	481.41	7.066	0.485	0.263	0.493091	0.0338451	0.0183531	3	b6
13.16	ww	orange	481.41	7.49	0.36	0.307	0.569149	0.0273556	0.0233283	3	b7
15.26	ww	orange	487.83	5.344	0.458	0.298	0.350197	0.0300131	0.0195282	3	b8
16.19	ww	orange	487.83	4.706	0.411	0.276	0.290673	0.025386	0.0170476	3	b9
13.48	ww	orange	487.83	6.975	0.425	0.251	0.517433	0.0315282	0.0186202	3	b10
15.86	ww	orange	487.83	6.016	0.444	0.253	0.379319	0.027995	0.0159521	3	b11
18.18	lw_ww	blue	487.83	7.638	0.604	0.266	0.420132	0.0332233	0.0146315	4	b12
19.11	lw_ww	blue	487.83	8.434	0.495	0.367	0.44134	0.0259027	0.0192046	4	b13
4.44	lw_ww	blue	653.4	1.633	0.118	0.071	0.367793	0.0265766	0.015991	6	b19
8.23	ww	orange	658.16	4.102	0.393	0.129	0.49842	0.0477521	0.0156744	3	b23
10.04	ww	orange	658.16	4.245	0.375	0.135	0.422809	0.0373506	0.0134462	3	b24
10.95	ww	orange	658.16	4.612	0.382	0.157	0.421187	0.0143379	0.0348858	3	b25
5.39	ww	orange	688.88	3.805	0.289	0.121	0.705937	0.0536178	0.022449	3	b26
17.7	ww_lw	orange	484.14	8.657	0.707	0.31	0.489096	0.0399435	0.0175141	7	b27
16.74	ww_lw	orange	484.14	8.206	0.607	0.268	0.490203	0.0362605	0.0160096	7	b28
14.17	ww_lw	orange	484.14	7.822	0.572	0.205	0.552011	0.040367	0.0144672	7	b29
19.32	ww_lw	orange	484.14	10.701	0.624	0.263	0.553882	0.0322981	0.0136128	7	b30
19.23	ww_lw	orange	486.94	10.393	0.485	0.223	0.540458	0.025221	0.0115965	7	b31
16.63	ww_lw	orange	486.94	9.617	0.698	0.245	0.578292	0.0419723	0.0147324	7	b32
20.92	ww_lw	orange	486.94	8.475	0.666	0.262	0.405115	0.0318356	0.0125239	7	b33
22.43	lw	blue	486.94	13.02	0.683	0.366	0.580473	0.0304503	0.0163174	8	b34
16.81	lw	blue	486.94	10.136	0.721	0.227	0.602974	0.0428911	0.0135039	8	b35
14.95	lw	blue	486.94	5.738	0.46	0.196	0.383813	0.0307692	0.0131104	8	b36
14.65	lw	blue	486.94	8.176	0.559	0.22	0.558089	0.038157	0.0150171	8	b37
17.87	lw	blue	486.94	10.008	0.814	0.219	0.560045	0.0455512	0.0122552	8	b38
16	lw	blue	486.53	7.713	0.608	0.242	0.482063	0.038	0.015125	9	b39
16.55	lw	blue	486.53	9.073	0.659	0.253	0.548218	0.0398187	0.015287	9	b40
8.64	lw	blue	486.53	5.385	0.437	0.145	0.623264	0.0505787	0.0167824	9	b41
16.35	lw	blue	486.53	10.917	0.708	0.259	0.667706	0.0433028	0.015841	9	b42
18.09	lw	blue	486.53	11.91	0.67	0.276	0.658375	0.037037	0.015257	9	b43
17.31	ww_lw	orange	486.53	8.419	0.613	0.241	0.486366	0.0354131	0.0139226	10	b44
10.62	ww_lw	orange	486.53	6.226	0.48	0.177	0.586252	0.0451977	0.0166667	10	b45
16.46	lw	blue	486.53	9.885	0.638	0.24	0.600547	0.0387606	0.0145808	11	b46
23.64	lw	blue	486.53	13.501	0.818	0.278	0.571108	0.0346024	0.0117597	11	b47
19.63	lw	blue	486.53	11.332	0.78	0.291	0.57728	0.0397351	0.0148242	11	b48
24.27	lw	blue	486.53	9.646	0.656	0.268	0.397445	0.0270293	0.0110424	11	b49
22.34	lw	blue	486.53	13.57	0.777	0.331	0.607431	0.0347807	0.0148165	11	b50
19.69	lw	blue	486.53	11.571	0.598	0.282	0.587659	0.0303707	0.014322	12	b51
21.36	lw	blue	486.53	8.254	0.642	0.3	0.386423	0.0300562	0.0140449	12	b52
18.91	lw	blue	486.53	7.307	0.726	0.291	0.386409	0.0383924	0.0153887	12	b53
21.93	lw	blue	487.71	11.673	0.648	0.316	0.532285	0.0295486	0.0144095	14	b61
21.46	lw	blue	487.71	10.454	0.558	0.263	0.487139	0.0260019	0.0122554	14	b62
