# Supplementary material for: Barnacles as biological flow indicators
Source: PeerJ. 2023 Apr 18;11:e15018. doi: 10.7717/peerj.15018 (PMC10120587; doi:10.7717/peerj.15018)
Supplement: Supplemental Information 6 [file peerj-11-15018-s006.xlsx]

## Sheet: lifesavers
station	Label Color	Position	Container Weight (g)	Container Plus Candy - Before (g)	Container Plus Candy - After (g)	Difference (g)	measured flow	Averages
1	Blue	Ambient	6.5	10.58	7.86	2.72	20.35	Control	1.334
1	Blue	Control	6.56	10.65	9.35	1.3		Protected	1.366
1	Blue	Protected	6.35	10.17	8.9	1.27		Unprotected	2.124
1	Blue	Unprotected	6.35	10.36	7.9	2.46		Ambient	1.718
2	Green	Ambient	6.11	9.95	7.53	2.42	21.38	Yellow	1.9375		protected			unprotected
2	Green	Control	6.62	10.7	9.44	1.26		Green	1.8425		mass lost	velocity		mass lost	velocity
2	Green	Protected	6.27	10.35	9	1.35		Blue	1.85667		1.33	0		1.33	0
2	Green	Unprotected	6.53	10.73	8.39	2.34		Red	1.6425		1.27	20.35		2.46	20.35
3	Orange	1	6.44	10.43				Orange	1.565		1.35	21.38		2.34	21.38
3	Orange	2/A	6.5	10.6	8.61	1.99	9.14				1.56	9.14		2.02	9.14
3	Orange	3/U	6.14	10.17	8.15	2.02					1.37	9.13		2.03	9.13
3	Orange	4/P	6.3	10.16	8.6	1.56					1.28	6.87		1.77	6.87
3	Orange	5/C	6.63	10.52	9.11	1.41
4	Red	Ambient	6.5	10.37	8.01	2.36	9.13
4	Red	Control	6.35	10.51	9.08	1.43
4	Red	Protected	6.21	10.09	8.72	1.37
4	Red	Unprotected	6.39	10.45	8.42	2.03
5	Yellow	Ambient	6.49	10.38	8.7	1.68	6.87
5	Yellow	Control	6.23	10.16	8.89	1.27
5	Yellow	Protected	6.51	10.5	9.22	1.28
5	Yellow	Unprotected	6.34	10.18	8.41	1.77
				Previous experiment
				Yellow	Ambient	1.65	13.2803
				Yellow	Control	1.09	0
				Orange/Yellow	Protected	1.28
				Yellow	Unprotected	1.55
				Green	Ambient	1.89	21.078
				Green	Control	1.22	0
				Green	Protected	1.28
				Green	Unprotected	1.72
