# Supplementary material for: Barnacles as biological flow indicators
Source: PeerJ. 2023 Apr 18;11:e15018. doi: 10.7717/peerj.15018 (PMC10120587; doi:10.7717/peerj.15018)
Supplement: Supplemental Information 7 [file peerj-11-15018-s007.xlsx]

## Sheet: Sheet1
pier	flow	treatment	comb	site	location	barnacle_id	species	ruler	scale	bd	ram_L	ram_W	set_L	adjRL	adjRW	adjSL	vel	vel_adj	turb	mu	p	l	u	Re	l_cl	Re2	l_sl	Re3	u_adj	Re_adj
csw	low	exp	low_exp	1	middle	b43	eburneus	b43_r	1389.75	7.47	2.594	0.101	0.19	0.347256	0.0135207	0.0254351	4.86	4.86	5.33333	0.0011	1025	0.000101	0.0486	4.57392	0.002594	117.473	0.00019	8.60441	0.0486	4.57392
csw	low	exp	low_exp	1	middle	b44	eburneus	b44_r	1320	8.26	2.194	0.092	0.202	0.265617	0.011138	0.0244552	4.86	4.86	5.33333	0.0011	1025	9.2e-05	0.0486	4.16635	0.002194	99.3583	0.000202	9.14785	0.0486	4.16635
csw	low	exp	low_exp	1	middle	b45	eburneus	b45_r	795	13.57	3.774	0.142	0.349	0.278113	0.0104643	0.0257185	4.86	4.86	5.33333	0.0011	1025	0.000142	0.0486	6.43066	0.003774	170.911	0.000349	15.8049	0.0486	6.43066
csw	low	exp	low_exp	1	middle	b46	eburneus	b46_r	836.086	8.66	2.675	0.101	0.213	0.308891	0.0116628	0.0245958	4.86	4.86	5.33333	0.0011	1025	0.000101	0.0486	4.57392	0.002675	121.141	0.000213	9.646	0.0486	4.57392
csw	low	exp	low_exp	1	middle	b47	eburneus	b47_r	527.77	8.48	3.842	0.151	0.436	0.453066	0.0178066	0.0514151	4.86	4.86	5.33333	0.0011	1025	0.000151	0.0486	6.83824	0.003842	173.99	0.000436	19.7449	0.0486	6.83824
csw	low	exp	low_exp	1	middle	b48	eburneus	b48_r	556.812	9.51	4.936	0.144	0.537	0.519033	0.015142	0.0564669	4.86	4.86	5.33333	0.0011	1025	0.000144	0.0486	6.52124	0.004936	223.533	0.000537	24.3188	0.0486	6.52124
csw	low	exp	low_exp	2	middle	b28	eburneus	b24_r	593.417	10.7	4.746	0.234	0.4	0.443551	0.0218692	0.0373832	4.86	4.86	5.33333	0.0011	1025	0.000234	0.0486	10.597	0.004746	214.929	0.0004	18.1145	0.0486	10.597
csw	low	exp	low_exp	2	middle	b29	eburneus	b24_r	593.417	11.55	4.938	0.24	0.397	0.427532	0.0207792	0.0343723	4.86	4.86	5.33333	0.0011	1025	0.00024	0.0486	10.8687	0.004938	223.624	0.000397	17.9787	0.0486	10.8687
csw	low	exp	low_exp	2	middle	b30	eburneus	b24_r	593.417	17.47	6.706	0.244	0.585	0.383858	0.0139668	0.033486	4.86	4.86	5.33333	0.0011	1025	0.000244	0.0486	11.0499	0.006706	303.69	0.000585	26.4925	0.0486	11.0499
csw	low	exp	low_exp	3	middle	b22	eburneus	b20_r	592.287	9.13	5.706	0.26	0.554	0.624973	0.0284775	0.0606791	4.86	4.86	5.33333	0.0011	1025	0.00026	0.0486	11.7745	0.005706	258.404	0.000554	25.0886	0.0486	11.7745
csw	low	exp	low_exp	3	middle	b23	eburneus	b20_r	592.287	11.09	5.395	0.23	0.427	0.486474	0.0207394	0.0385032	4.86	4.86	5.33333	0.0011	1025	0.00023	0.0486	10.4159	0.005395	244.32	0.000427	19.3373	0.0486	10.4159
csw	low	exp	low_exp	3	middle	b84	eburneus	b84_r	762.407	8.84	5.236	0.175	0.442	0.592308	0.0197964	0.05	4.86	4.86	5.33333	0.0011	1025	0.000175	0.0486	7.92511	0.005236	237.119	0.000442	20.0166	0.0486	7.92511
csw	low	exp	low_exp	3	middle	b85	eburneus	b84_r	762.407	10.62	6.55	0.212	0.499	0.616761	0.0199623	0.0469868	4.86	4.86	5.33333	0.0011	1025	0.000212	0.0486	9.60071	0.00655	296.626	0.000499	22.5979	0.0486	9.60071
csw	low	exp	low_exp	3	middle	b86	eburneus	b84_r	762.407	10.54	6.191	0.232	0.624	0.587381	0.0220114	0.059203	4.86	4.86	5.33333	0.0011	1025	0.000232	0.0486	10.5064	0.006191	280.368	0.000624	28.2587	0.0486	10.5064
csw	low	exp	low_exp	3	middle	b88	eburneus	b88_r	757.337	10.35	4.246	0.203	0.421	0.410242	0.0196135	0.0406763	4.86	4.86	5.33333	0.0011	1025	0.000203	0.0486	9.19313	0.004246	192.286	0.000421	19.0656	0.0486	9.19313
csw	low	exp	low_exp	4	middle	b8	eburneus	b8_r	477.058	9.7	4.655	0.196	0.45	0.479897	0.0202062	0.0463918	4.86	4.86	5.33333	0.0011	1025	0.000196	0.0486	8.87613	0.004655	210.808	0.00045	20.3789	0.0486	8.87613
csw	low	exp	low_exp	4	middle	b9	eburneus	b9_r	512.283	6.68	4.202	0.213	0.302	0.629042	0.0318862	0.0452096	4.86	4.86	5.33333	0.0011	1025	0.000213	0.0486	9.646	0.004202	190.293	0.000302	13.6765	0.0486	9.646
csw	low	exp	low_exp	4	middle	b10	eburneus	b9_r	512.283	14.13	6.503	0.286	0.581	0.460226	0.0202406	0.0411182	4.86	4.86	5.33333	0.0011	1025	0.000286	0.0486	12.9519	0.006503	294.497	0.000581	26.3114	0.0486	12.9519
csw	low	exp	low_exp	4	middle	b11	eburneus	b9_r	512.283	14.33	7.709	0.295	0.571	0.537962	0.0205862	0.0398465	4.86	4.86	5.33333	0.0011	1025	0.000295	0.0486	13.3595	0.007709	349.113	0.000571	25.8585	0.0486	13.3595
csw	low	exp	low_exp	4	middle	b12	eburneus	b12_r	510.272	11.59	5.284	0.24	0.477	0.45591	0.0207075	0.0411562	4.86	4.86	5.33333	0.0011	1025	0.00024	0.0486	10.8687	0.005284	239.293	0.000477	21.6016	0.0486	10.8687
csw	low	exp	low_exp	5	middle	b74	eburneus	b73_r	708.139	13.82	6.386	0.192	0.592	0.462084	0.0138929	0.0428365	4.86	4.86	5.33333	0.0011	1025	0.000192	0.0486	8.69498	0.006386	289.199	0.000592	26.8095	0.0486	8.69498
csw	low	exp	low_exp	5	middle	b75	eburneus	b73_r	708.139	11.97	5.363	0.2	0.506	0.448037	0.0167084	0.0422723	4.86	4.86	5.33333	0.0011	1025	0.0002	0.0486	9.05727	0.005363	242.871	0.000506	22.9149	0.0486	9.05727
csw	low	exp	low_exp	5	middle	b77	eburneus	b73_r	708.139	8.8	5.28	0.17	0.516	0.6	0.0193182	0.0586364	4.86	4.86	5.33333	0.0011	1025	0.00017	0.0486	7.69868	0.00528	239.112	0.000516	23.3678	0.0486	7.69868
csw	low	exp	low_exp	5	middle	b78	eburneus	b73_r	708.139	11.21	6.683	0.229	0.606	0.596164	0.0204282	0.0540589	4.86	4.86	5.33333	0.0011	1025	0.000229	0.0486	10.3706	0.006683	302.649	0.000606	27.4435	0.0486	10.3706
csw	low	exp	low_exp	7	middle	b17	eburneus	b17_r	494.846	10.33	7.214	0.319	0.642	0.698354	0.0308809	0.0621491	4.86	4.86	5.33333	0.0011	1025	0.000319	0.0486	14.4463	0.007214	326.696	0.000642	29.0738	0.0486	14.4463
csw	low	exp	low_exp	7	middle	b18	eburneus	b18_r	767.387	9.05	3.535	0.175	0.556	0.390608	0.019337	0.0614365	4.86	4.86	5.33333	0.0011	1025	0.000175	0.0486	7.92511	0.003535	160.087	0.000556	25.1792	0.0486	7.92511
csw	low	exp	low_exp	7	middle	b21	eburneus	b20_r	592.287	9.36	6.006	0.184	0.489	0.641667	0.0196581	0.0522436	4.86	4.86	5.33333	0.0011	1025	0.000184	0.0486	8.33269	0.006006	271.99	0.000489	22.145	0.0486	8.33269
csw	low	exp	low_exp	8	middle	b69	eburneus	b64_r	677.044	10.29	5.473	0.193	0.507	0.531876	0.0187561	0.0492711	4.86	4.86	5.33333	0.0011	1025	0.000193	0.0486	8.74027	0.005473	247.852	0.000507	22.9602	0.0486	8.74027
csw	low	exp	low_exp	8	middle	b71	eburneus	b70_r	617.392	9.46	5.232	0.177	0.378	0.553066	0.0187104	0.0399577	4.86	4.86	5.33333	0.0011	1025	0.000177	0.0486	8.01569	0.005232	236.938	0.000378	17.1182	0.0486	8.01569
csw	low	exp	low_exp	8	middle	b72	eburneus	b70_r	617.392	7.32	4.333	0.148	0.336	0.59194	0.0202186	0.0459016	4.86	4.86	5.33333	0.0011	1025	0.000148	0.0486	6.70238	0.004333	196.226	0.000336	15.2162	0.0486	6.70238
csw	low	prot	low_prot	1	middle	b32	eburneus	b32_r	961.2	8.7	3.844	0.131	0.333	0.441839	0.0150575	0.0382759	4.86	2.43	5.33333	0.0011	1025	0.000131	0.0486	5.93251	0.003844	174.081	0.000333	15.0804	0.0243	5.93251
csw	low	prot	low_prot	1	middle	b33	eburneus	b33_r	605.767	8.7	4.189	0.158	0.283	0.481494	0.0181609	0.0325287	4.86	2.43	5.33333	0.0011	1025	0.000158	0.0486	7.15525	0.004189	189.705	0.000283	12.816	0.0243	7.15525
csw	low	prot	low_prot	2	middle	b66	eburneus	b64_r	677.044	8.89	3.209	0.124	0.381	0.360967	0.0139483	0.0428571	4.86	2.43	5.33333	0.0011	1025	0.000124	0.0486	5.61551	0.003209	145.324	0.000381	17.2541	0.0243	5.61551
csw	low	prot	low_prot	2	middle	b68	eburneus	b64_r	677.044	10.77	3.876	0.177	0.408	0.359889	0.0164345	0.037883	4.86	2.43	5.33333	0.0011	1025	0.000177	0.0486	8.01569	0.003876	175.53	0.000408	18.4768	0.0243	8.01569
csw	low	prot	low_prot	4	middle	b60	eburneus	b55_r	1038.8	12.14	4.259	0.118	0.328	0.350824	0.00971993	0.0270181	4.86	2.43	5.33333	0.0011	1025	0.000118	0.0486	5.34379	0.004259	192.875	0.000328	14.8539	0.0243	5.34379
csw	low	prot	low_prot	4	middle	b61	eburneus	b55_r	1038.8	11.79	4.21	0.127	0.314	0.357082	0.0107718	0.0266327	4.86	2.43	5.33333	0.0011	1025	0.000127	0.0486	5.75137	0.00421	190.656	0.000314	14.2199	0.0243	5.75137
csw	low	prot	low_prot	4	middle	b62	eburneus	b55_r	1038.8	4.93	1.981	0.067	0.133	0.401826	0.0135903	0.0269777	4.86	2.43	5.33333	0.0011	1025	6.7e-05	0.0486	3.03419	0.001981	89.7123	0.000133	6.02309	0.0243	3.03419
csw	low	prot	low_prot	5	middle	b54	eburneus	b54_r	660.159	10.48	6.216	0.179	0.492	0.59313	0.0170802	0.0469466	4.86	2.43	5.33333	0.0011	1025	0.000179	0.0486	8.10626	0.006216	281.5	0.000492	22.2809	0.0243	8.10626
csw	low	prot	low_prot	5	middle	b55	eburneus	b55_r	1038.8	9.63	4.03	0.133	0.343	0.418484	0.013811	0.0356179	4.86	2.43	5.33333	0.0011	1025	0.000133	0.0486	6.02309	0.00403	182.504	0.000343	15.5332	0.0243	6.02309
csw	low	prot	low_prot	5	middle	b56	eburneus	b55_r	1038.8	10.82	3.588	0.103	0.354	0.331608	0.00951941	0.0327172	4.86	2.43	5.33333	0.0011	1025	0.000103	0.0486	4.6645	0.003588	162.487	0.000354	16.0314	0.0243	4.6645
csw	low	prot	low_prot	5	middle	b57	eburneus	b55_r	1038.8	10.44	2.962	0.099	0.267	0.283716	0.00948276	0.0255747	4.86	2.43	5.33333	0.0011	1025	9.9e-05	0.0486	4.48335	0.002962	134.138	0.000267	12.0915	0.0243	4.48335
csw	low	prot	low_prot	5	middle	b58	eburneus	b55_r	1038.8	7.48	2.767	0.089	0.172	0.36992	0.0118984	0.0229947	4.86	2.43	5.33333	0.0011	1025	8.9e-05	0.0486	4.03049	0.002767	125.307	0.000172	7.78925	0.0243	4.03049
csw	low	prot	low_prot	7	middle	b93	eburneus	b91_r	653.558	15.46	8.841	0.264	0.65	0.571863	0.0170763	0.042044	4.86	2.43	5.33333	0.0011	1025	0.000264	0.0486	11.9556	0.008841	400.377	0.00065	29.4361	0.0243	11.9556
csw	low	prot	low_prot	7	middle	b94	eburneus	b91_r	653.558	8.42	4.84	0.183	0.399	0.574822	0.021734	0.0473872	4.86	2.43	5.33333	0.0011	1025	0.000183	0.0486	8.2874	0.00484	219.186	0.000399	18.0693	0.0243	8.2874
csw	low	prot	low_prot	7	middle	b95	eburneus	b91_r	653.558	9.64	4.031	0.174	0.5	0.418154	0.0180498	0.0518672	4.86	2.43	5.33333	0.0011	1025	0.000174	0.0486	7.87983	0.004031	182.549	0.0005	22.6432	0.0243	7.87983
csw	low	prot	low_prot	7	middle	b96	eburneus	b91_r	653.558	11.08	4.741	0.205	0.554	0.427888	0.0185018	0.05	4.86	2.43	5.33333	0.0011	1025	0.000205	0.0486	9.2837	0.004741	214.703	0.000554	25.0886	0.0243	9.2837
csw	low	prot	low_prot	8	middle	b49	eburneus	b49_r	627.6	8.83	4.272	0.142	0.327	0.483805	0.0160815	0.0370328	4.86	2.43	5.33333	0.0011	1025	0.000142	0.0486	6.43066	0.004272	193.463	0.000327	14.8086	0.0243	6.43066
csw	low	prot	low_prot	8	middle	b50	eburneus	b49_r	627.6	10	6.21	0.214	0.631	0.621	0.0214	0.0631	4.86	2.43	5.33333	0.0011	1025	0.000214	0.0486	9.69128	0.00621	281.228	0.000631	28.5757	0.0243	9.69128
csw	low	prot	low_prot	8	middle	b51	eburneus	b49_r	627.6	7.56	5.403	0.197	0.391	0.714683	0.0260582	0.0517196	4.86	2.43	5.33333	0.0011	1025	0.000197	0.0486	8.92141	0.005403	244.682	0.000391	17.707	0.0243	8.92141
csw	low	prot	low_prot	8	middle	b52	eburneus	b49_r	627.6	7.72	5.132	0.178	0.59	0.664767	0.023057	0.0764249	4.86	2.43	5.33333	0.0011	1025	0.000178	0.0486	8.06097	0.005132	232.41	0.00059	26.719	0.0243	8.06097
csw	low	prot	low_prot	8	middle	b53	eburneus	b49_r	627.6	7.12	4.512	0.121	0.327	0.633708	0.0169944	0.045927	4.86	2.43	5.33333	0.0011	1025	0.000121	0.0486	5.47965	0.004512	204.332	0.000327	14.8086	0.0243	5.47965
lec	high	exp	high_exp	9	middle	b97	eburneus	b91_r	653.558	7.07	4.764	0.19	0.414	0.673833	0.0268741	0.0585573	28.4433	28.4433	14.81	0.0011	1025	0.00019	0.284433	50.3576	0.004764	1262.65	0.000414	109.727	0.284433	50.3576
lec	high	exp	high_exp	9	middle	b100	eburneus	b99_r	604.788	9.04	5.117	0.236	0.474	0.56604	0.0261062	0.0524336	28.4433	28.4433	14.81	0.0011	1025	0.000236	0.284433	62.5495	0.005117	1356.21	0.000474	125.629	0.284433	62.5495
lec	high	exp	high_exp	9	middle	b101	eburneus	b99_r	604.788	12.29	6.444	0.215	0.594	0.524329	0.0174939	0.048332	28.4433	28.4433	14.81	0.0011	1025	0.000215	0.284433	56.9836	0.006444	1707.92	0.000594	157.434	0.284433	56.9836
lec	high	exp	high_exp	9	middle	b102	eburneus	b102_r	565.995	11.43	7.041	0.218	0.542	0.61601	0.0190726	0.0474191	28.4433	28.4433	14.81	0.0011	1025	0.000218	0.284433	57.7788	0.007041	1866.15	0.000542	143.652	0.284433	57.7788
lec	high	exp	high_exp	9	middle	b103	eburneus	b102_r	565.995	7.01	4.292	0.163	0.283	0.612268	0.0232525	0.0403709	28.4433	28.4433	14.81	0.0011	1025	0.000163	0.284433	43.2015	0.004292	1137.55	0.000283	75.0064	0.284433	43.2015
lec	high	exp	high_exp	13	middle	b105	eburneus	b102_r	565.995	11.66	6.57	0.217	0.437	0.563465	0.0186106	0.0374786	28.4433	28.4433	14.81	0.0011	1025	0.000217	0.284433	57.5137	0.00657	1741.31	0.000437	115.823	0.284433	57.5137
lec	high	exp	high_exp	13	middle	b106	eburneus	b106_r	821.926	10.76	3.979	0.129	0.316	0.369796	0.0119888	0.029368	28.4433	28.4433	14.81	0.0011	1025	0.000129	0.284433	34.1902	0.003979	1054.59	0.000316	83.7527	0.284433	34.1902
lec	high	exp	high_exp	13	middle	b107	eburneus	b106_r	821.926	9.02	3.374	0.096	0.255	0.374058	0.010643	0.0282705	28.4433	28.4433	14.81	0.0011	1025	9.6e-05	0.284433	25.4439	0.003374	894.245	0.000255	67.5852	0.284433	25.4439
lec	high	exp	high_exp	13	middle	b108	eburneus	b106_r	821.926	9.65	3.213	0.101	0.293	0.332953	0.0104663	0.0303627	28.4433	28.4433	14.81	0.0011	1025	0.000101	0.284433	26.7691	0.003213	851.574	0.000293	77.6568	0.284433	26.7691
lec	high	exp	high_exp	13	middle	b110	eburneus	b106_r	821.926	8.91	3.342	0.146	0.255	0.375084	0.0163861	0.0286195	28.4433	28.4433	14.81	0.0011	1025	0.000146	0.284433	38.6959	0.003342	885.764	0.000255	67.5852	0.284433	38.6959
lec	high	prot	high_prot	9	middle	b1	eburneus	b1_r	615.7	7	5.182	0.248		0.740286	0.0354286		28.4433	14.2217	14.81	0.0011	1025	0.000248	0.284433	65.73	0.005182	1373.44			0.142217	65.73
lec	high	prot	high_prot	9	middle	b2	eburneus	b2_r	621.618	7.34	4.811	0.189	0.428	0.65545	0.0257493	0.0583106	28.4433	14.2217	14.81	0.0011	1025	0.000189	0.284433	50.0926	0.004811	1275.11	0.000428	113.437	0.142217	50.0926
lec	high	prot	high_prot	9	middle	b3	eburneus	b3_r	556.8	6.52	5.71	0.221	0.492	0.875767	0.0338957	0.0754601	28.4433	14.2217	14.81	0.0011	1025	0.000221	0.284433	58.5739	0.00571	1513.38	0.000492	130.4	0.142217	58.5739
lec	high	prot	high_prot	9	middle	b5	eburneus	b5_r	660	10.5	5.881	0.178	0.492	0.560095	0.0169524	0.0468571	28.4433	14.2217	14.81	0.0011	1025	0.000178	0.284433	47.1771	0.005881	1558.7	0.000492	130.4	0.142217	47.1771
lec	high	prot	high_prot	9	middle	b6	eburneus	b6_r	774.01	7.19	5.033	0.18	0.434	0.7	0.0250348	0.0603616	28.4433	14.2217	14.81	0.0011	1025	0.00018	0.284433	47.7072	0.005033	1333.95	0.000434	115.027	0.142217	47.7072
lec	high	prot	high_prot	13	middle	b37	eburneus	b35_r	611.5	9.04	6.525	0.207	0.563	0.721792	0.0228982	0.0622788	28.4433	14.2217	14.81	0.0011	1025	0.000207	0.284433	54.8633	0.006525	1729.39	0.000563	149.218	0.142217	54.8633
lec	high	prot	high_prot	13	middle	b38	eburneus	b35_r	611.5	10.12	7.534	0.25	0.793	0.744466	0.0247036	0.0783597	28.4433	14.2217	14.81	0.0011	1025	0.00025	0.284433	66.26	0.007534	1996.81	0.000793	210.177	0.142217	66.26
lec	high	prot	high_prot	13	middle	b39	eburneus	b35_r	611.5	10.55	7.029	0.257	0.5	0.666256	0.0243602	0.0473934	28.4433	14.2217	14.81	0.0011	1025	0.000257	0.284433	68.1153	0.007029	1862.97	0.0005	132.52	0.142217	68.1153
lec	high	prot	high_prot	13	middle	b40	eburneus	b35_r	611.5	10.85	6.558	0.238	0.508	0.604424	0.0219355	0.0468203	28.4433	14.2217	14.81	0.0011	1025	0.000238	0.284433	63.0796	0.006558	1738.13	0.000508	134.64	0.142217	63.0796
lec	high	prot	high_prot	13	middle	b41	eburneus	b35_r	611.5	10.73	5.052	0.251	0.453	0.470829	0.0233924	0.0422181	28.4433	14.2217	14.81	0.0011	1025	0.000251	0.284433	66.5251	0.005052	1338.98	0.000453	120.063	0.142217	66.5251
