# Supplementary material for: Barnacles as biological flow indicators
Source: PeerJ. 2023 Apr 18;11:e15018. doi: 10.7717/peerj.15018 (PMC10120587; doi:10.7717/peerj.15018)
Supplement: Supplemental Information 8 [file peerj-11-15018-s008.xlsx]

## Sheet: leeward
1 Month	2 Day	3 Hour	4 Minute	5 Second	6 Significant height (Hs)	7 Mean zerocrossing period (Tm02)	8 Peak period (Tp)	9 Peak direction (DirTp)	10 Directional spread (SprTp)	11 Mean direction (Mdir)	12 Unidirectivity index	13 Mean Pressure	14 Current speed (wave cell)	15 Current direction (wave cell)	16 Error Code
(1-12)	(1-31)	(0-23)	(0-59)	(0-59)	(m)	(s)	(s)	(deg)	(deg)	(deg)		(dbar)	(m/s)	(degrees)
5	7	14	0	0	0.15	1.31	1.33	325.66	55.96	325.79	1	0.86	0.03	253.5	2049
5	7	14	15	0	0.16	1.32	1.33	260.27	67.96	260.66	0.96	0.86	0.03	109	2049
5	7	14	30	0	0.15	1.31	1.33	205.21	57.75	204.28	0.99	0.86	0.02	109.9	2049
5	7	14	45	0	0.17	1.31	1.33	192.8	54.03	193.43	1	0.87	0.03	91.4	2049
5	7	15	0	0	0.12	1.31	1.33	229.86	56.13	230.92	0.99	0.87	0.05	102	2049
5	7	15	15	0	0.12	1.31	1.33	203.13	42.05	203.95	1	0.86	0.04	111.2	2049
5	7	15	30	0	0.17	1.33	1.33	192.96	59.4	194.99	0.98	0.86	0.03	114.6	2049
5	7	15	45	0	0.18	1.31	1.33	194.21	38.9	195	1	0.87	0.05	101.9	2049
5	7	16	0	0	0.16	1.31	1.33	187.2	42.79	189.61	0.99	0.86	0.05	105.2	2049
5	7	16	15	0	0.26	1.31	1.33	189.96	37.93	193.09	0.98	0.86	0.04	99.8	2049
5	7	16	30	0	0.23	1.31	1.33	196	38.59	196.07	1	0.86	0.04	99	2049
5	7	16	45	0	0.21	1.32	1.33	193.64	37.96	193.97	1	0.86	0.04	98.3	2049
5	7	17	0	0	0.21	1.31	1.33	194.88	40.32	196.47	1	0.86	0.05	103	2049
5	7	17	15	0	0.21	1.3	1.31	203.86	42.17	203.1	1	0.85	0.05	107.3	2049
5	7	17	30	0	0.27	1.3	1.31	187.1	32.63	187.37	1	0.85	0.02	92.8	2049
5	7	17	45	0	0.26	1.31	1.31	210.99	50.79	214.34	0.98	0.84	0.03	94.7	2049
5	7	18	0	0	0.22	1.31	1.31	214.68	60.85	219.02	0.99	0.84	0.03	122.7	2049
5	7	18	15	0	0.24	1.31	1.31	207.1	40.48	209.23	1	0.83	0.04	108.8	2049
5	7	18	30	0	0.2	1.3	1.31	202.95	47.41	205.79	0.99	0.82	0.05	124.5	2049
5	7	18	45	0	0.22	1.33	1.31	207.25	59.54	214.9	0.95	0.82	0.07	42.2	2049
5	7	19	0	0	0.21	1.3	1.3	185.58	53.18	186.26	1	0.81	0.05	93	2049
5	7	19	15	0	0.23	1.3	1.3	205.26	51.19	210.95	0.97	0.81	0.04	93.2	2049
5	7	19	30	0	0.19	1.3	1.3	198.8	42.26	200.99	1	0.8	0.06	114.3	2049
5	7	19	45	0	0.2	1.31	1.3	188.81	46.27	190.89	1	0.79	0.06	114	2049
5	7	20	0	0	0.2	1.31	1.3	200.15	45.05	202.57	0.99	0.79	0.04	112.8	2049
5	7	20	15	0	0.18	1.3	1.3	186.25	49.83	187.42	1	0.79	0.05	102	2049
5	7	20	30	0	0.16	1.3	1.3	200.7	45.65	205.39	0.98	0.78	0.04	96	2049
5	7	20	45	0	0.15	1.3	1.3	204	40.92	207.5	0.98	0.78	0.03	100.1	2049
5	7	21	0	0	0.23	1.32	1.3	177.79	45.83	180.07	1	0.78	0.02	108.4	2049
5	7	21	15	0	0.17	1.31	1.3	204.1	40.06	205.14	1	0.78	0.05	98.1	2049
5	7	21	30	0	0.2	1.28	1.28	192.95	44.61	192.22	1	0.78	0.03	104.5	2049
5	7	21	45	0	0.16	1.31	1.3	178.7	41.78	179.93	1	0.77	0.04	101.2	2049
5	7	22	0	0	0.17	1.3	1.3	186.86	41.94	187.77	1	0.78	0.05	116	2049
5	7	22	15	0	0.13	1.3	1.28	185.75	48.76	188.87	0.99	0.77	0.04	108.2	2049
5	7	22	30	0	0.17	1.29	1.28	195.03	37.06	194.04	1	0.76	0.04	91.7	2049
5	7	22	45	0	0.24	1.33	1.28	206.66	56.86	212.4	0.97	0.76	0.06	93.9	2049
5	7	23	0	0	0.13	1.3	1.28	216.81	46.7	219.03	0.99	0.76	0.06	107.8	2049
5	7	23	15	0	0.18	1.3	1.3	183.06	56.97	182.61	1	0.78	0.03	72.2	2049
5	7	23	30	0	0.21	1.3	1.28	194.93	41.82	198.46	0.99	0.76	0.02	96.6	2049
5	7	23	45	0	0.14	1.3	1.26	203.56	53.86	202.97	0.99	0.74	0.05	111.4	2049
5	8	0	0	0	0.15	1.31	1.28	192.9	47.09	193.1	1	0.75	0.07	103.7	2049
5	8	0	15	0	0.1	1.3	1.28	188.56	59.87	187.03	1	0.76	0.03	101.9	2049
5	8	0	30	0	0.17	1.29	1.26	200.66	44.18	206.33	0.95	0.74	0.03	79.2	2049
5	8	0	45	0	0.18	1.29	1.26	187.86	47.11	189.56	1	0.73	0.05	101	2049
5	8	1	0	0	0.17	1.29	1.26	193.69	56.34	194.71	1	0.74	0.03	89.2	2049
5	8	1	15	0	0.15	1.3	1.28	182.29	41.07	182.34	1	0.75	0.04	100.1	2049
5	8	1	30	0	0.16	1.3	1.28	194.76	42.67	196.99	0.99	0.75	0.03	99.7	2049
5	8	1	45	0	0.11	1.3	1.28	193.24	50.26	192.54	1	0.76	0.02	87	2049
5	8	2	0	0	0.16	1.29	1.26	200.73	44.48	201.31	0.99	0.74	0.05	100.4	2049
5	8	2	15	0	0.19	1.3	1.28	206.27	48.15	206.41	1	0.76	0.03	102.4	2049
5	8	2	30	0	0.31	1.3	1.3	168.59	66.14	167.97	0.99	0.77	0.05	127.7	2049
5	8	2	45	0	0.19	1.3	1.28	228.56	63.4	236.18	0.96	0.77	0.03	101.3	2049
5	8	3	0	0	0.21	1.29	1.28	192.74	50.27	193.8	1	0.76	0.03	100.4	2049
5	8	3	15	0	0.22	1.29	1.28	191.64	37.08	192.08	1	0.77	0.05	106.3	2049
5	8	3	30	0	0.17	1.3	1.3	200.79	32.37	201.04	1	0.78	0.03	125.4	2049
5	8	3	45	0	0.2	1.3	1.3	192.6	36.75	192.64	1	0.78	0.05	114.3	2049
5	8	4	0	0	0.24	1.3	1.28	194.53	60	197.69	0.99	0.78	0.04	54.4	2049
5	8	4	15	0	0.19	1.29	1.28	191.46	40.33	194.08	0.99	0.78	0.04	104.1	2049
5	8	4	30	0	0.17	1.3	1.3	183.31	41.4	185.2	1	0.79	0.04	116.9	2049
5	8	4	45	0	0.12	1.29	1.3	201.83	49.37	202.86	1	0.79	0.04	110.3	2049
5	8	5	0	0	0.21	1.3	1.3	191.51	44.2	192.55	1	0.8	0.05	104.1	2049
5	8	5	15	0	0.27	1.31	1.31	176.28	38.42	178.4	0.99	0.8	0.05	111.8	2049
5	8	5	30	0	0.24	1.3	1.3	192.01	29.81	192.8	1	0.81	0.02	94.7	2049
5	8	5	45	0	0.17	1.31	1.3	189.75	47.25	189.28	1	0.81	0.03	39.6	2049
5	8	6	0	0	0.27	1.31	1.3	182.9	37.22	182.64	1	0.81	0.03	44.9	2049
5	8	6	15	0	0.19	1.3	1.3	206.01	59.91	206.19	1	0.81	0.03	26.1	2049
5	8	6	30	0	0.14	1.31	1.31	194.29	39.95	196.03	1	0.82	0.03	30.4	2049
5	8	6	45	0	0.26	1.32	1.31	227.51	65.4	229.68	0.97	0.82	0.03	28.7	2049
5	8	7	0	0	0.23	1.31	1.31	189.46	38.53	189.34	1	0.82	0.02	63.5	2049
5	8	7	15	0	0.22	1.31	1.31	185.33	33.28	185.61	1	0.82	0.03	117.2	2049
5	8	7	30	0	0.19	1.3	1.31	173.65	42.35	172.98	1	0.82	0.03	115.1	2049
5	8	7	45	0	0.19	1.31	1.31	218.42	58.95	219.19	1	0.82	0.03	69.1	2049
5	8	8	0	0	0.11	1.31	1.31	204.62	53.93	206.22	1	0.83	0.03	116.6	2049
5	8	8	15	0	0.21	1.31	1.31	198.55	44.15	197.78	1	0.84	0.03	96.8	2049
5	8	8	30	0	0.17	1.3	1.31	197.65	35.22	198.54	1	0.84	0.02	84.8	2049
5	8	8	45	0	0.18	1.31	1.33	186.43	35.63	187.46	1	0.85	0.03	106.8	2049
5	8	9	0	0	0.17	1.31	1.33	201.04	40.11	201.33	1	0.85	0.04	111	2049
5	8	9	15	0	0.18	1.32	1.33	193.54	48.62	194	1	0.86	0.03	87.2	2049
5	8	9	30	0	0.17	1.31	1.33	192.04	39.07	192.91	1	0.87	0.04	98.3	2049
5	8	9	45	0	0.23	1.33	1.35	190.79	39.22	190.21	1	0.87	0.05	115.3	2049
5	8	10	0	0	0.2	1.31	1.33	199.24	44.83	198.98	1	0.87	0.05	115.4	2049
5	8	10	15	0	0.21	1.31	1.33	198.46	38.94	198.88	1	0.87	0.04	93.4	2049
5	8	10	30	0	0.2	1.33	1.35	194.83	48.02	194.5	1	0.88	0.05	112.1	2049
5	8	10	45	0	0.2	1.33	1.35	204.29	38.32	203.69	1	0.88	0.05	112.2	2049
5	8	11	0	0	0.2	1.33	1.35	181.28	42.35	184.06	0.98	0.89	0.05	109.6	2049
5	8	11	15	0	0.3	1.33	1.35	184.79	42.79	186.08	1	0.89	0.03	120	2049
5	8	11	30	0	0.2	1.34	1.35	246.43	60.76	241.63	0.99	0.9	0.05	84.2	2049
5	8	11	45	0	0.23	1.34	1.35	197.4	46.44	198.25	1	0.89	0.05	84.7	2049
5	8	12	0	0	0.24	1.33	1.35	188.46	40.2	191.28	1	0.9	0.02	109.8	2049
5	8	12	15	0	0.21	1.32	1.35	193.68	54.03	193.43	1	0.9	0.06	111.6	2049
5	8	12	30	0	0.2	1.33	1.35	219.55	46.98	220.56	1	0.9	0.06	107.3	2049
5	8	12	45	0	0.22	1.34	1.35	196.69	41.04	199.14	0.99	0.9	0.05	104.1	2049
5	8	13	0	0	0.21	1.33	1.35	206.19	44.43	206.15	1	0.89	0.03	103.8	2049
5	8	13	15	0	0.23	1.33	1.35	216.38	52.89	218.29	0.97	0.89	0.03	62.3	2049
5	8	13	30	0	0.15	1.32	1.35	194.48	61.56	192.27	0.99	0.9	0.05	102	2049
5	8	13	45	0	0.28	1.32	1.35	191.99	36.62	192.49	1	0.9	0.05	123	2049
5	8	14	0	0	0.22	1.34	1.35	225.99	54.74	224.88	0.99	0.9	0.05	86.8	2049
5	8	14	15	0	0.26	1.31	1.33	198.44	34.23	200.84	0.99	0.89	0.07	108.2	2049
5	8	14	30	0	0.22	1.31	1.33	197.27	48.67	198.2	1	0.88	0.05	100	2049
5	8	14	45	0	0.28	1.33	1.35	180.93	45.15	182.93	0.99	0.88	0.07	119.3	2049
5	8	15	0	0	0.35	1.33	1.35	192.55	33.17	194.27	1	0.88	0.06	122.6	2049
5	8	15	15	0	0.25	1.34	1.33	203.74	43.52	207.46	0.99	0.88	0.08	89.7	2049
5	8	15	30	0	0.29	1.31	1.33	189.04	40.94	191.26	0.99	0.87	0.04	104.3	2049
5	8	15	45	0	0.15	1.31	1.33	242.06	58.23	243.32	1	0.87	0.06	115.4	2049
5	8	16	0	0	0.25	1.32	1.33	182.79	60.46	188.26	0.93	0.86	0.06	91.6	2049
5	8	16	15	0	0.2	1.31	1.33	205.55	47.88	206.9	1	0.86	0.06	115.5	2049
5	8	16	30	0	0.25	1.31	1.33	195.35	46.5	198.72	0.99	0.86	0.06	130.7	2049
5	8	16	45	0	0.25	1.32	1.33	190.3	55.21	192.94	0.97	0.86	0.05	108.5	2049
5	8	17	0	0	0.15	1.32	1.33	206.14	47.99	210.11	0.99	0.85	0.08	112.3	2049
5	8	17	15	0	0.2	1.32	1.33	213.8	58.34	220.39	0.98	0.86	0.06	105.4	2049
5	8	17	30	0	0.18	1.32	1.33	236.98	48.8	238.46	1	0.85	0.07	113.1	2049
5	8	17	45	0	0.22	1.32	1.33	198.93	49.46	199.9	0.99	0.85	0.06	104.9	2049
5	8	18	0	0	0.18	1.32	1.31	211.42	53.32	216.46	0.98	0.85	0.08	110.7	2049
5	8	18	15	0	0.29	1.3	1.31	195.97	51.72	200.7	0.99	0.84	0.06	128.1	2049
5	8	18	30	0	0.13	1.31	1.31	219.19	67.27	218.79	0.97	0.84	0.08	118.2	2049
5	8	18	45	0	0.18	1.31	1.31	218.69	60.99	231.01	0.93	0.84	0.03	91.3	2049
5	8	19	0	0	0.22	1.32	1.31	198.78	48.67	202.78	0.97	0.83	0.05	125.7	2049
5	8	19	15	0	0.17	1.32	1.31	214.08	54.52	221.09	0.97	0.82	0.08	112.2	2049
5	8	19	30	0	0.26	1.31	1.31	189.21	49.73	189.7	1	0.82	0.07	106.7	2049
5	8	19	45	0	0.2	1.31	1.31	199.25	47.97	207.05	0.97	0.82	0.06	114.5	2049
5	8	20	0	0	0.15	1.29	1.3	218.99	60.96	221.02	0.98	0.81	0.05	126.3	2049
5	8	20	15	0	0.15	1.29	1.3	215.11	51.76	217.34	0.99	0.81	0.06	114.3	2049
5	8	20	30	0	0.16	1.29	1.3	215.13	54.53	218.63	0.98	0.8	0.07	130.7	2049
5	8	20	45	0	0.12	1.31	1.3	237.43	63.72	238.91	1	0.8	0.07	121.4	2049
5	8	21	0	0	0.18	1.3	1.3	189	51.08	194.15	0.93	0.8	0.06	110.4	2049
5	8	21	15	0	0.16	1.3	1.3	217.3	50.82	218.78	1	0.79	0.05	117.1	2049
5	8	21	30	0	0.13	1.31	1.3	187.84	60.27	201.38	0.94	0.79	0.06	120.9	2049
5	8	21	45	0	0.14	1.3	1.3	202.41	59.33	206.17	0.98	0.79	0.06	122.2	2049
5	8	22	0	0	0.14	1.32	1.3	220.01	55.16	225.08	0.97	0.79	0.08	85.6	2049
5	8	22	15	0	0.22	1.3	1.3	207.06	52.06	211.43	1	0.79	0.08	112.4	2049
5	8	22	30	0	0.17	1.3	1.3	179.1	47.86	181.6	1	0.79	0.06	103.5	2049
5	8	22	45	0	0.23	1.31	1.31	180.32	40.34	181.13	1	0.79	0.02	150.5	2049
5	8	23	0	0	0.24	1.31	1.3	213	64.11	224.48	0.84	0.79	0.03	51.7	2049
5	8	23	15	0	0.24	1.3	1.3	192.17	44.22	193.57	1	0.78	0.05	122.4	2049
5	8	23	30	0	0.15	1.29	1.28	184.96	46.88	185.66	1	0.78	0.05	94.3	2049
5	8	23	45	0	0.24	1.3	1.28	195.23	40.09	194.72	1	0.77	0.04	73.7	2049
5	9	0	0	0	0.15	1.3	1.28	221.51	51.12	222	1	0.77	0.04	87.3	2049
5	9	0	15	0	0.15	1.29	1.28	188.06	52.07	186.55	1	0.76	0.07	108.3	2049
5	9	0	30	0	0.16	1.33	1.28	203.51	46.65	203.6	0.99	0.75	0.05	101	2049
5	9	0	45	0	0.18	1.3	1.3	184.04	50.56	186.02	0.99	0.76	0.04	134	2049
5	9	1	0	0	0.13	1.3	1.28	203.61	44.41	205.51	1	0.76	0.04	97.4	2049
5	9	1	15	0	0.18	1.29	1.28	196.16	46.85	198.01	1	0.75	0.03	119.6	2049
5	9	1	30	0	0.2	1.29	1.26	192.14	50.3	191.88	1	0.75	0.03	50.1	2049
5	9	1	45	0	0.22	1.31	1.28	201.71	44.58	202.11	1	0.75	0.04	96.3	2049
5	9	2	0	0	0.12	1.3	1.28	197.9	43.95	198.92	1	0.75	0.04	109	2049
5	9	2	15	0	0.26	1.31	1.28	193.2	59.26	195.99	0.99	0.75	0.01	17.2	2049
5	9	2	30	0	0.16	1.29	1.26	212.68	58.33	216.6	0.96	0.74	0.04	116.5	2049
5	9	2	45	0	0.15	1.3	1.28	197.48	41.25	198.68	1	0.75	0.06	118.2	2049
5	9	3	0	0	0.16	1.3	1.28	209.05	50.5	210.22	0.99	0.76	0.06	113.7	2049
5	9	3	15	0	0.16	1.3	1.28	209.64	55.61	208.39	1	0.76	0.05	125.6	2049
5	9	3	30	0	0.24	1.3	1.28	204.19	61.01	205.06	1	0.76	0.05	133.1	2049
5	9	3	45	0	0.17	1.3	1.28	192.3	41.55	191.85	1	0.76	0.07	112.5	2049
5	9	4	0	0	0.16	1.29	1.28	186.71	47.85	188.24	0.99	0.77	0.06	113.7	2049
5	9	4	15	0	0.19	1.32	1.28	210.44	65.61	227.39	0.89	0.77	0.04	73.7	2049
5	9	4	30	0	0.2	1.29	1.28	179.43	42.46	180.47	0.99	0.77	0.04	99	2049
5	9	4	45	0	0.24	1.29	1.28	203.58	29.06	203.9	1	0.77	0.06	111.8	2049
5	9	5	0	0	0.12	1.3	1.3	189.81	48.69	190.48	0.99	0.78	0.05	129.2	2049
5	9	5	15	0	0.18	1.3	1.3	201.66	42.44	202.7	1	0.77	0.05	123.7	2049
5	9	5	30	0	0.17	1.29	1.28	197.1	46.27	199	0.99	0.78	0.05	104	2049
5	9	5	45	0	0.16	1.3	1.3	198.96	38.4	199.21	1	0.78	0.03	121.3	2049
5	9	6	0	0	0.13	1.29	1.28	206.4	47.54	206.47	1	0.78	0.06	112.9	2049
5	9	6	15	0	0.17	1.3	1.3	206.93	45.44	207.69	1	0.79	0.05	117.7	2049
5	9	6	30	0	0.13	1.31	1.31	168.61	39.61	168.98	1	0.8	0.04	109.8	2049
5	9	6	45	0	0.18	1.3	1.3	203.38	43.19	206.15	0.99	0.8	0.04	116.6	2049
5	9	7	0	0	0.14	1.31	1.3	214.88	47.88	215.17	1	0.8	0.06	116.8	2049
5	9	7	15	0	0.22	1.31	1.31	187.99	36.28	189.23	1	0.81	0.04	110.8	2049
5	9	7	30	0	0.16	1.3	1.3	177.2	44.69	180.52	1	0.81	0.03	80.8	2049
5	9	7	45	0	0.17	1.3	1.3	207.84	45.41	209.39	1	0.81	0.03	117.3	2049
5	9	8	0	0	0.21	1.31	1.31	194.36	36.9	194.38	1	0.82	0.05	111.6	2049
5	9	8	15	0	0.13	1.3	1.31	194.8	35.61	195.26	1	0.83	0.03	120.6	2049
5	9	8	30	0	0.14	1.31	1.31	203.54	40.99	205.07	1	0.83	0.04	108.9	2049
5	9	8	45	0	0.19	1.31	1.31	195.59	35.18	196.07	1	0.83	0.04	106.9	2049
5	9	9	0	0	0.08	1.3	1.31	199.34	54.5	199.92	1	0.84	0.04	102	2049
5	9	9	15	0	0.17	1.3	1.31	201.9	33.43	202.33	1	0.84	0.04	105	2049
5	9	9	30	0	0.24	1.3	1.31	199.67	30.78	199.78	1	0.84	0.05	113.5	2049
5	9	9	45	0	0.1	1.32	1.33	208.68	52.36	210.05	1	0.85	0.06	109.7	2049
5	9	10	0	0	0.13	1.32	1.33	206.2	49.05	207.49	1	0.85	0.07	111.8	2049
5	9	10	15	0	0.19	1.31	1.33	196.46	48.6	198.34	0.99	0.86	0.07	114.5	2049
5	9	10	30	0	0.18	1.31	1.33	198.46	46.64	198.72	1	0.86	0.05	129.2	2049
5	9	10	45	0	0.22	1.31	1.33	207.21	43.93	209.66	0.99	0.86	0.06	115.2	2049
5	9	11	0	0	0.19	1.31	1.33	193.12	46.23	195.18	1	0.86	0.06	115.2	2049
5	9	11	15	0	0.23	1.33	1.33	187.97	43.18	190.94	0.99	0.86	0.06	120.3	2049
5	9	11	30	0	0.17	1.31	1.33	216.54	48.82	217.23	1	0.87	0.07	109.7	2049
5	9	11	45	0	0.19	1.32	1.33	221.08	45.32	221.74	1	0.87	0.06	115.5	2049
5	9	12	0	0	0.2	1.32	1.33	193.64	45.63	197.39	0.99	0.87	0.07	108.5	2049
5	9	12	15	0	0.24	1.33	1.35	198.33	42.98	199.17	1	0.87	0.04	127.7	2049
5	9	12	30	0	0.2	1.31	1.33	201.18	46.07	202.23	1	0.88	0.04	92.6	2049
5	9	12	45	0	0.25	1.32	1.33	209.48	41.02	210.12	1	0.88	0.07	112.3	2049
5	9	13	0	0	0.21	1.31	1.33	203.54	38.27	207.52	0.98	0.88	0.05	103.4	2049
5	9	13	15	0	0.29	1.33	1.35	187.44	31.47	188.8	1	0.89	0.05	120.9	2049
5	9	13	30	0	0.25	1.33	1.35	202.87	44.26	204.03	1	0.9	0.03	99.1	2049
5	9	13	45	0	0.24	1.31	1.33	202.41	36.71	202.36	1	0.88	0.04	99.1	2049
5	9	14	0	0	0.2	1.33	1.35	210.68	48.39	210.71	1	0.9	0.06	107.9	2049
5	9	14	15	0	0.28	1.33	1.35	202.53	44.37	201.33	1	0.89	0.04	124.5	2049
5	9	14	30	0	0.22	1.35	1.37	189.75	42.64	189.37	1	0.9	0.03	146.5	2049
5	9	14	45	0	0.34	1.34	1.37	189.72	56.04	191.29	0.99	0.89	0.03	201.7	2049
5	9	15	0	0	0.26	1.34	1.35	205.68	52.65	204.69	0.99	0.89	0.06	64.3	2049
5	9	15	15	0	0.29	1.32	1.33	199.16	39.5	201.65	0.99	0.88	0.06	109.6	2049
5	9	15	30	0	0.28	1.33	1.35	216.25	55.87	213.07	1	0.89	0.04	99	2049
5	9	15	45	0	0.29	1.33	1.35	195	42.55	194.87	1	0.88	0.05	104	2049
5	9	16	0	0	0.22	1.32	1.33	198.35	37.75	201.22	0.99	0.87	0.07	118.7	2049
5	9	16	15	0	0.3	1.33	1.33	190.41	40.67	194.98	0.97	0.87	0.05	119	2049
5	9	16	30	0	0.21	1.33	1.35	184.74	38.28	185.77	1	0.88	0.06	113.3	2049
5	9	16	45	0	0.22	1.31	1.33	206.01	48.13	207.73	0.99	0.87	0.06	110	2049
5	9	17	0	0	0.34	1.31	1.33	193.1	37.8	193.83	1	0.87	0.08	113.4	2049
5	9	17	15	0	0.22	1.32	1.33	224.72	45.32	228.95	0.98	0.88	0.07	112.1	2049
5	9	17	30	0	0.16	1.31	1.33	201.66	45.14	204.13	1	0.86	0.06	118.8	2049
5	9	17	45	0	0.23	1.31	1.33	216.3	41.46	215.62	1	0.87	0.06	110.9	2049
5	9	18	0	0	0.24	1.32	1.33	199.18	48.9	205.65	0.97	0.87	0.08	109	2049
5	9	18	15	0	0.16	1.32	1.33	206.57	55.64	213.36	0.96	0.88	0.05	126.8	2049
5	9	18	30	0	0.19	1.32	1.33	214.18	42.57	215.09	1	0.87	0.06	101.9	2049
5	9	18	45	0	0.2	1.32	1.33	195.59	46.64	198.91	0.99	0.87	0.05	100.6	2049
5	9	19	0	0	0.16	1.31	1.33	215.44	48.4	217.22	1	0.87	0.07	114.1	2049
5	9	19	15	0	0.24	1.31	1.33	202.98	43.22	206.65	0.99	0.87	0.06	121	2049
5	9	19	30	0	0.2	1.32	1.33	201.32	55.99	201.07	1	0.86	0.03	97	2049
5	9	19	45	0	0.31	1.32	1.33	199.14	40.48	204.28	0.97	0.86	0.06	108.5	2049
5	9	20	0	0	0.2	1.32	1.33	205.53	41.53	206.93	1	0.86	0.04	105.3	2049
5	9	20	15	0	0.19	1.32	1.33	210.17	41.98	213.76	0.99	0.86	0.04	103.1	2049
5	9	20	30	0	0.2	1.33	1.33	200.56	51.36	204.15	0.99	0.84	0.03	134.3	2049
5	9	20	45	0	0.17	1.3	1.31	212.23	49.84	220.6	0.97	0.84	0.04	125.9	2049
5	9	21	0	0	0.17	1.3	1.31	206.24	58.86	208.61	0.98	0.84	0.06	117.1	2049
5	9	21	15	0	0.19	1.3	1.31	197.59	37.05	199.28	1	0.85	0.05	108.3	2049
5	9	21	30	0	0.29	1.32	1.31	202.76	31.27	204.98	0.99	0.84	0.06	122.9	2049
5	9	21	45	0	0.21	1.32	1.33	197.63	40.07	200.47	0.98	0.85	0.04	136.8	2049
5	9	22	0	0	0.15	1.3	1.31	199.26	50.21	202.58	0.99	0.84	0.05	115.6	2049
5	9	22	15	0	0.11	1.31	1.31	214.74	69.45	217.03	0.98	0.84	0.05	114.3	2049
5	9	22	30	0	0.24	1.3	1.31	198.07	37.01	201.96	0.99	0.84	0.04	119.9	2049
5	9	22	45	0	0.2	1.31	1.31	208.71	50.21	213.27	0.98	0.83	0.04	111.6	2049
5	9	23	0	0	0.16	1.32	1.31	193.65	57.02	202.85	0.92	0.83	0.05	93.5	2049
5	9	23	15	0	0.18	1.31	1.31	193.97	42.44	198.88	0.97	0.82	0.07	115.5	2049
5	9	23	30	0	0.16	1.32	1.31	202.69	50.13	211.06	0.95	0.82	0.06	106.9	2049
5	9	23	45	0	0.25	1.3	1.3	196.04	41.73	200.1	0.99	0.81	0.06	105.7	2049
11	5	0	0	0	0.2	1.3	1.3	207.54	45.11	212.63	0.98	0.82	0.06	121.1	2049
11	5	0	15	0	0.15	1.3	1.3	203.91	57.72	207.65	0.99	0.81	0.07	93.1	2049
11	5	0	30	0	0.19	1.31	1.31	204.78	42.28	205.94	0.99	0.82	0.03	123.1	2049
11	5	0	45	0	0.17	1.29	1.3	184.36	48.18	185.38	0.99	0.81	0.05	93.4	2049
11	5	1	0	0	0.17	1.31	1.31	179.22	42.85	178.54	1	0.81	0.01	102.2	2049
11	5	1	15	0	0.2	1.3	1.3	183.34	42.88	184.07	1	0.81	0.01	52.2	2049
11	5	1	30	0	0.15	1.31	1.31	191.24	45.1	193.28	0.99	0.81	0.03	151.3	2049
11	5	1	45	0	0.16	1.33	1.31	192.98	47.64	194.04	1	0.81	0.02	221.9	2049
11	5	2	0	0	0.13	1.3	1.3	207.11	46.33	207.02	1	0.79	0.01	117.7	2049
11	5	2	15	0	0.1	1.3	1.3	206.52	40.62	206.45	1	0.79	0.02	103.6	2049
11	5	2	30	0	0.11	1.31	1.31	193.22	38.92	194.1	1	0.8	0.01	222.9	2049
11	5	2	45	0	0.12	1.29	1.3	175.73	49.73	176.2	1	0.8	0.01	113.5	2049
11	5	3	0	0	0.11	1.3	1.3	199.51	46.85	204.46	0.96	0.8	0.02	119	2049
11	5	3	15	0	0.08	1.32	1.3	261.21	59.82	259.88	0.99	0.81	0.04	113.9	2049
11	5	3	30	0	0.12	1.3	1.3	236.96	59.13	236.05	0.99	0.81	0.03	114	2049
11	5	3	45	0	0.09	1.33	1.31	242.21	68.09	242.29	0.97	0.82	0.04	117.4	2049
11	5	4	0	0	0.1	1.31	1.3	212.07	60.6	213.09	0.99	0.81	0.08	115	2049
11	5	4	15	0	0.12	1.29	1.3	224.87	60.73	222.91	0.98	0.81	0.07	124.1	2049
11	5	4	30	0	0.1	1.3	1.3	249.14	56.55	248.73	0.99	0.81	0.05	128.6	2049
11	5	4	45	0	0.12	1.31	1.31	253.5	60.73	253.13	0.99	0.82	0.05	133.5	2049
11	5	5	0	0	0.1	1.31	1.31	235.62	56.61	235.02	1	0.82	0.04	127	2049
11	5	5	15	0	0.09	1.32	1.31	252.6	44.3	251.67	0.99	0.82	0.04	129	2049
11	5	5	30	0	0.08	1.3	1.31	244.69	51.42	244.44	1	0.83	0.04	125.8	2049
11	5	5	45	0	0.12	1.32	1.31	236.07	49.62	236.34	1	0.83	0.03	114.6	2049
11	5	6	0	0	0.17	1.3	1.31	200.37	40.73	201.1	1	0.84	0.05	120.4	2049
11	5	6	15	0	0.13	1.31	1.31	218.43	55.81	220.65	0.99	0.84	0.03	106.7	2049
11	5	6	30	0	0.16	1.3	1.31	212.93	45.65	213.34	1	0.84	0.03	101.5	2049
11	5	6	45	0	0.14	1.3	1.31	203.04	43	203.31	1	0.84	0.04	118.2	2049
11	5	7	0	0	0.19	1.31	1.33	202.02	43	203.34	1	0.85	0.02	117	2049
11	5	7	15	0	0.15	1.31	1.33	210.36	45.52	210.52	1	0.86	0.02	115.4	2049
11	5	7	30	0	0.14	1.31	1.33	195.37	43.18	195.91	1	0.87	0.03	98.3	2049
11	5	7	45	0	0.17	1.31	1.33	189.36	33.22	190.36	1	0.87	0.03	98.2	2049
11	5	8	0	0	0.16	1.31	1.33	213.46	43.36	214.26	1	0.88	0.03	127.2	2049
11	5	8	15	0	0.17	1.33	1.35	201.02	39.64	201.26	1	0.88	0.05	116.8	2049
11	5	8	30	0	0.27	1.33	1.35	192.92	31.96	192.7	1	0.88	0.04	122.7	2049
11	5	8	45	0	0.1	1.33	1.35	226.28	55.07	224.64	0.99	0.89	0.04	123.3	2049
11	5	9	0	0	0.13	1.33	1.35	211.9	46.7	211.52	1	0.89	0.04	117.3	2049
11	5	9	15	0	0.19	1.33	1.35	205.27	43.27	205.23	1	0.9	0.03	109	2049
11	5	9	30	0	0.14	1.33	1.35	216.88	48.56	216.35	1	0.91	0.04	99.7	2049
11	5	9	45	0	0.18	1.32	1.35	205.04	34.21	204.95	1	0.91	0.03	118.9	2049
11	5	10	0	0	0.1	1.34	1.37	199.56	54.65	197.63	1	0.91	0.01	133.1	2049
11	5	10	15	0	0.1	1.33	1.37	210.86	42.32	210.84	1	0.92	0.01	244.3	2049
11	5	10	30	0	0.02	1.28	1.09	350.4	76.13	359.4	0.98	0.41	0.05	129.7	2051
11	5	10	45	0	0.05	1.28	1.07	223.96	70.19	198.93	0.83	0.4	0.02	359.2	2051
11	5	11	0	0	0.03	1.26	1.1	343.95	72.99	339.21	0.92	0.41	0.05	263.9	2051
11	5	11	15	0	0.04	1.32	1.11	72.92	78.35	103.93	0.81	0.41	0.04	117.3	2051
11	5	11	30	0	0.04	1.29	1.1	63.26	73.19	55.36	0.77	0.42	0.01	82.5	2051
11	5	11	45	0	0.03	1.27	1.09	40.73	71.89	39.21	0.98	0.41	0.02	232.9	2051
11	5	12	0	0	0.03	1.24	1.09	189.54	70.21	212.17	0.95	0.39	0.03	145.4	2051
11	5	12	15	0	0.04	1.35	1.08	198.87	72.12	229.13	0.81	0.38	0.02	298.1	2051
11	5	12	30	0	0.02	1.26	1.07	290.95	76.22	321.32	0.87	0.38	0.05	244	2051
11	5	12	45	0	0.02	1.31	1.06	218.55	72.71	216.64	0.94	0.37	0.02	47	2051
11	5	13	0	0	0.01	1.24	1.07	145.88	68.66	162.74	0.88	0.37	0.04	207.5	2051
11	5	13	15	0	0.02	1.25	1.06	148.73	70.71	156.5	0.99	0.37	0.01	71.9	2051
11	5	13	30	0	0.02	1.25	1.07	103.03	77.44	159.25	0.71	0.37	0.04	110.5	2051
11	5	13	45	0	0.01	1.27	1.05	161.33	67.34	163.33	1	0.36	0.04	358	2051
11	5	14	0	0	0.02	1.25	1.05	118.09	70.6	111.11	0.71	0.35	0.01	33.4	2051
11	5	14	15	0	0.01	1.26	1.06	33.89	80.24	187.69	0.24	0.36	0.01	154.8	2051
11	5	14	30	0	0.02	1.31	1.05	255.67	76.06	250.14	0.91	0.35	0.02	129	2051
11	5	14	45	0	0.02	1.23	1.05	27.02	69.18	31.05	0.99	0.36	0.02	113	2051
				Average	0.178322	1.30812	1.29863	200.001	48.6845	202.641	0.982158	0.800651	0.0442466	112.633
				Minimum	0.01	1.23	1.05	27.02	29.06	31.05	0.24	0.35	0.01	17.2
				Maximum	0.35	1.35	1.37	350.4	80.24	359.4	1	0.92	0.08	359.2
				Median	0.18	1.31	1.31	199.255	46.7	201.33	1	0.82	0.04	110.85

## Sheet: windward
1 Month	2 Day	3 Hour	4 Minute	5 Second	6 Significant height (Hs)	7 Mean zerocrossing period (Tm02)	8 Peak period (Tp)	9 Peak direction (DirTp)	10 Directional spread (SprTp)	11 Mean direction (Mdir)	12 Unidirectivity index	13 Mean Pressure	14 Current speed (wave cell)	15 Current direction (wave cell)	16 Error Code
(1-12)	(1-31)	(0-23)	(0-59)	(0-59)	(m)	(s)	(s)	(deg)	(deg)	(deg)		(dbar)	(m/s)	(degrees)
5	7	14	0	0	0.13	1.4	1.49	346.28	46.59	346	1	1.22	0.05	93.8	2050
5	7	14	15	0	0.14	1.4	1.49	314.63	45.58	313.4	1	1.22	0.06	207.1	2050
5	7	14	30	0	0.14	1.4	1.49	331.93	46.56	330.47	1	1.22	0.05	210.5	2050
5	7	14	45	0	0.16	1.4	1.49	331.1	36.68	329.36	1	1.22	0.06	202.1	2048
5	7	15	0	0	0.14	1.39	1.49	320.75	45.45	318.92	1	1.23	0.06	206.4	2050
5	7	15	15	0	0.18	1.4	1.49	308.8	41.09	307.7	1	1.22	0.05	201.8	2048
5	7	15	30	0	0.19	1.4	1.49	321.72	32.29	321.79	1	1.22	0.07	213.1	2050
5	7	15	45	0	0.37	1.4	1.49	310.98	49.16	312.27	1	1.22	0.05	191.4	2048
5	7	16	0	0	0.16	1.4	1.49	311.11	44.54	309.37	1	1.22	0.08	204.6	2050
5	7	16	15	0	0.3	1.4	1.49	307.17	32.35	308.1	1	1.21	0.08	207.1	2048
5	7	16	30	0	0.57	1.39	1.49	307.23	46.37	306.59	1	1.21	0.04	215.2	2048
5	7	16	45	0	0.32	1.4	1.49	309.4	33.12	309.92	1	1.21	0.08	198.3	2048
5	7	17	0	0	0.39	1.41	1.49	321.52	23.27	321.72	1	1.21	0.1	208.2	2048
5	7	17	15	0	0.4	1.4	1.49	292.18	30.55	292.13	1	1.2	0.08	204.6	2048
5	7	17	30	0	0.49	1.4	1.49	311.69	64.07	312.13	1	1.2	0.03	196.5	2048
5	7	17	45	0	0.32	1.4	1.49	310.91	33.26	310.9	1	1.2	0.08	204	2048
5	7	18	0	0	0.39	1.41	1.49	320.53	53.98	319.91	1	1.19	0.05	194.5	2048
5	7	18	15	0	0.31	1.41	1.49	309.98	46.24	310.99	1	1.19	0.08	216.7	2048
5	7	18	30	0	0.28	1.39	1.47	306.4	32.34	307.47	1	1.18	0.07	206.2	2048
5	7	18	45	0	0.36	1.39	1.47	304.18	29.69	304.23	1	1.17	0.09	208.3	2048
5	7	19	0	0	0.39	1.39	1.47	304.42	49.36	304.95	1	1.16	0.07	195.6	2048
5	7	19	15	0	0.51	1.39	1.47	311.16	40.34	310.44	1	1.16	0.05	202.4	2048
5	7	19	30	0	0.23	1.39	1.47	297.31	37.8	297.56	1	1.15	0.09	212.7	2048
5	7	19	45	0	0.29	1.39	1.47	303.66	37.02	303.92	1	1.14	0.11	218	2048
5	7	20	0	0	0.3	1.39	1.47	289.76	31.77	290.55	1	1.14	0.08	209.3	2048
5	7	20	15	0	0.25	1.39	1.47	310.87	36.28	310.6	1	1.14	0.07	211.2	2048
5	7	20	30	0	0.27	1.37	1.44	312.31	35.86	313.22	1	1.13	0.07	215.4	2048
5	7	20	45	0	0.29	1.37	1.44	307.4	32.75	310.01	1	1.13	0.06	214.9	2048
5	7	21	0	0	0.3	1.37	1.44	313.88	31.98	313.53	1	1.13	0.06	205.6	2048
5	7	21	15	0	0.28	1.38	1.44	313.16	32.65	313.45	1	1.13	0.06	209.9	2048
5	7	21	30	0	0.28	1.37	1.44	301.88	31.1	303.19	1	1.12	0.08	209.7	2048
5	7	21	45	0	0.29	1.37	1.44	309.96	31.53	311.2	1	1.11	0.07	212.1	2048
5	7	22	0	0	0.31	1.37	1.44	313.04	51.02	314.29	1	1.12	0.08	224.7	2048
5	7	22	15	0	0.31	1.36	1.44	299.6	45.76	301.44	1	1.11	0.08	215.9	2048
5	7	22	30	0	0.3	1.37	1.44	299.27	33.66	300.03	1	1.11	0.1	205.2	2048
5	7	22	45	0	0.52	1.37	1.44	313.18	63.58	314.01	1	1.09	0.04	200.2	2048
5	7	23	0	0	0.34	1.36	1.44	289.66	42.84	291.59	1	1.1	0.16	220.7	2048
5	7	23	15	0	0.46	1.37	1.44	303.75	33.08	305.34	1	1.12	0.07	233.2	2048
5	7	23	30	0	0.32	1.37	1.44	313.19	37.13	313.62	1	1.1	0.02	214.9	2048
5	7	23	45	0	0.3	1.36	1.43	318.3	29.98	318.73	1	1.09	0.06	215.4	2048
5	8	0	0	0	0.24	1.37	1.44	318.1	38.13	319.37	1	1.1	0.1	219.2	2048
5	8	0	15	0	0.25	1.37	1.44	310.73	37.75	312.79	1	1.1	0.09	213.1	2048
5	8	0	30	0	0.23	1.36	1.43	315.03	34.48	316.59	1	1.08	0.06	215.6	2048
5	8	0	45	0	0.28	1.36	1.43	313.25	32.04	313.4	1	1.08	0.1	211.9	2048
5	8	1	0	0	0.2	1.36	1.43	311.13	44.7	311.81	1	1.09	0.09	211	2050
5	8	1	15	0	0.3	1.37	1.44	310.61	30.92	311.11	1	1.09	0.08	214.2	2048
5	8	1	30	0	0.24	1.38	1.44	310.7	28.08	311.09	1	1.1	0.05	193	2048
5	8	1	45	0	0.27	1.37	1.44	305.29	31.6	304.73	1	1.1	0.07	205.9	2048
5	8	2	0	0	0.31	1.36	1.43	308.47	40.5	308.01	1	1.09	0.11	216.2	2048
5	8	2	15	0	0.35	1.37	1.44	293.01	50.47	294.92	1	1.1	0.08	209.8	2048
5	8	2	30	0	0.51	1.37	1.44	304.57	51.23	305.79	1	1.11	0.03	185.4	2048
5	8	2	45	0	0.47	1.4	1.49	245.54	67.76	249.89	0.97	1.11	0.06	240.7	2048
5	8	3	0	0	0.33	1.37	1.44	301.24	31.51	301.73	1	1.11	0.08	212.4	2048
5	8	3	15	0	0.42	1.36	1.44	299.47	33.9	299.24	1	1.11	0.09	208.5	2048
5	8	3	30	0	0.41	1.37	1.44	303.07	47.07	302.88	1	1.12	0.05	186.5	2048
5	8	3	45	0	0.37	1.37	1.44	316.02	40.39	314.76	1	1.12	0.08	208.8	2048
5	8	4	0	0	0.33	1.37	1.44	312.65	37.88	313.48	1	1.12	0.09	208.8	2048
5	8	4	15	0	0.26	1.37	1.44	296.01	39.38	297.35	1	1.12	0.09	209.5	2048
5	8	4	30	0	0.36	1.39	1.47	298.06	42.97	300.23	1	1.13	0.07	219.8	2048
5	8	4	45	0	0.32	1.37	1.44	307.62	28.95	308.88	1	1.13	0.1	213.2	2048
5	8	5	0	0	0.46	1.39	1.47	297.28	39.35	296.65	1	1.14	0.07	227.5	2048
5	8	5	15	0	0.36	1.39	1.47	302.78	27.66	302.74	1	1.14	0.07	204.5	2048
5	8	5	30	0	0.39	1.4	1.47	291.95	53.81	293.51	0.99	1.15	0.05	165.5	2048
5	8	5	45	0	0.27	1.38	1.47	306.26	43.94	305.92	1	1.15	0.06	220.4	2048
5	8	6	0	0	0.31	1.39	1.47	301.95	27.77	301.91	1	1.15	0.06	206.1	2048
5	8	6	15	0	0.37	1.39	1.47	315.6	39.37	315.85	1	1.16	0.04	195	2048
5	8	6	30	0	0.25	1.39	1.47	302.87	33.88	302.63	1	1.16	0.04	199.5	2050
5	8	6	45	0	0.29	1.39	1.47	299.7	28.86	299.33	1	1.16	0.05	201.7	2048
5	8	7	0	0	0.19	1.39	1.47	306.3	36.19	305.96	1	1.16	0.06	201.3	2050
5	8	7	15	0	0.2	1.38	1.47	308.11	32.33	308.56	1	1.16	0.07	204.6	2050
5	8	7	30	0	0.24	1.38	1.47	289.75	39.67	289.66	1	1.16	0.07	211.3	2050
5	8	7	45	0	0.34	1.39	1.47	297.13	22.37	297.15	1	1.17	0.07	206.5	2048
5	8	8	0	0	0.3	1.39	1.47	306.71	33.51	307.3	1	1.17	0.06	209.3	2048
5	8	8	15	0	0.35	1.38	1.47	308.56	25.49	308.9	1	1.18	0.06	208.1	2048
5	8	8	30	0	0.26	1.38	1.47	320.45	32.36	320.5	1	1.18	0.05	212	2048
5	8	8	45	0	0.17	1.4	1.49	297.86	47.55	297.06	1	1.19	0.05	203.2	2050
5	8	9	0	0	0.26	1.4	1.49	323.19	54.68	321.08	1	1.2	0.06	204.9	2048
5	8	9	15	0	0.37	1.4	1.49	294.16	48.05	294.72	1	1.2	0.05	225.2	2048
5	8	9	30	0	0.26	1.4	1.49	301.73	35.85	302	1	1.21	0.08	202.8	2048
5	8	9	45	0	0.44	1.4	1.49	303.29	24.21	303.4	1	1.21	0.1	205	2048
5	8	10	0	0	0.28	1.4	1.49	301.35	47.79	301.5	1	1.21	0.09	209.3	2048
5	8	10	15	0	0.3	1.41	1.49	326.35	33.69	326.39	1	1.22	0.09	214	2048
5	8	10	30	0	0.22	1.4	1.49	317.51	43.63	317.41	1	1.22	0.11	207.6	2048
5	8	10	45	0	0.37	1.41	1.51	288.35	51.49	288.88	1	1.22	0.07	224.3	2048
5	8	11	0	0	0.35	1.4	1.49	306.96	24.93	306.76	1	1.23	0.09	203.4	2048
5	8	11	15	0	0.35	1.41	1.49	318.05	50.48	319.69	1	1.23	0.08	192.9	2048
5	8	11	30	0	0.52	1.4	1.51	299.82	54.15	299.31	1	1.23	0.07	233.1	2048
5	8	11	45	0	0.39	1.4	1.49	301.4	36.11	301.77	1	1.23	0.1	209.8	2048
5	8	12	0	0	0.36	1.41	1.51	298.95	50.27	298.67	1	1.23	0.1	214.9	2048
5	8	12	15	0	0.34	1.4	1.49	296.91	41.52	297.48	0.99	1.24	0.11	205.4	2048
5	8	12	30	0	0.38	1.41	1.51	294.63	55.17	295.07	1	1.23	0.09	216.6	2048
5	8	12	45	0	0.25	1.41	1.49	309.61	34.16	310.18	1	1.24	0.11	214.3	2050
5	8	13	0	0	0.29	1.4	1.49	314.95	37.03	315.92	1	1.23	0.1	210	2048
5	8	13	15	0	0.38	1.4	1.49	309.63	51.64	310.85	1	1.23	0.07	200.6	2048
5	8	13	30	0	0.24	1.42	1.51	316.4	35.68	317.89	1	1.24	0.11	208.2	2048
5	8	13	45	0	0.33	1.39	1.49	307.55	34.19	307.45	1	1.24	0.1	210.8	2048
5	8	14	0	0	0.22	1.4	1.49	298.21	42.84	298.74	0.99	1.23	0.11	205.5	2048
5	8	14	15	0	0.26	1.4	1.49	325.99	39.65	326.8	1	1.23	0.09	205.3	2048
5	8	14	30	0	0.22	1.4	1.49	317.85	44.47	318.74	0.99	1.22	0.09	216.3	2048
5	8	14	45	0	0.48	1.41	1.51	287.06	60.01	287.92	0.99	1.22	0.06	240.3	2048
5	8	15	0	0	0.42	1.41	1.49	321.55	37.63	321.49	1	1.23	0.12	210.1	2048
5	8	15	15	0	0.43	1.41	1.49	319.95	34.32	321.22	1	1.22	0.11	209.6	2048
5	8	15	30	0	0.29	1.4	1.49	308.94	38.36	309.06	1	1.21	0.14	212.1	2048
5	8	15	45	0	0.32	1.4	1.49	291.25	51.99	293.8	0.99	1.21	0.1	219.9	2048
5	8	16	0	0	0.44	1.41	1.49	310.15	46.67	310.34	0.99	1.21	0.08	212.5	2048
5	8	16	15	0	0.3	1.41	1.49	318.84	38.8	319.27	1	1.2	0.1	210.2	2048
5	8	16	30	0	0.29	1.4	1.49	314.02	41.48	314.16	1	1.2	0.12	219.3	2048
5	8	16	45	0	0.27	1.41	1.49	312.91	40.97	313.24	0.99	1.2	0.11	216.5	2048
5	8	17	0	0	0.22	1.41	1.49	322.23	43.91	321.76	1	1.2	0.12	215.3	2048
5	8	17	15	0	0.37	1.4	1.49	323.95	49.5	322.97	1	1.2	0.08	221.4	2048
5	8	17	30	0	0.26	1.41	1.49	313.16	40.44	314.28	1	1.19	0.11	210.8	2048
5	8	17	45	0	0.36	1.4	1.49	290.66	54.94	292.22	0.99	1.19	0.1	216.7	2048
5	8	18	0	0	0.26	1.42	1.49	313.37	37.62	316.28	0.99	1.19	0.12	209.9	2048
5	8	18	15	0	0.27	1.39	1.47	299.02	39.97	299.92	0.99	1.18	0.1	209.5	2048
5	8	18	30	0	0.27	1.39	1.47	313.26	37.19	313.72	1	1.18	0.13	214.6	2048
5	8	18	45	0	0.34	1.39	1.47	310.6	31.49	312.04	1	1.18	0.13	217.2	2048
5	8	19	0	0	0.31	1.38	1.47	300.42	50.3	301.1	0.99	1.18	0.09	224.6	2048
5	8	19	15	0	0.21	1.41	1.47	341.3	33.67	340.43	1	1.17	0.14	212.9	2048
5	8	19	30	0	0.26	1.39	1.47	302.04	49.01	303.57	0.99	1.17	0.12	219.9	2048
5	8	19	45	0	0.31	1.39	1.47	305.91	35.22	307.47	0.99	1.17	0.11	214.6	2048
5	8	20	0	0	0.2	1.4	1.47	323.37	37.05	323.92	1	1.16	0.14	212.2	2048
5	8	20	15	0	0.22	1.4	1.47	311.39	58.85	311.32	0.98	1.15	0.11	214.5	2048
5	8	20	30	0	0.22	1.4	1.47	313.79	41.58	313.66	1	1.14	0.13	212.8	2048
5	8	20	45	0	0.16	1.4	1.47	323.71	47.99	324.59	1	1.14	0.12	209.7	2048
5	8	21	0	0	0.22	1.36	1.44	319.59	38.53	319.24	1	1.14	0.09	218.5	2048
5	8	21	15	0	0.29	1.38	1.44	322.62	46.35	324.72	1	1.14	0.11	202.7	2048
5	8	21	30	0	0.25	1.38	1.44	318.75	39.62	321.62	0.99	1.13	0.12	216.1	2048
5	8	21	45	0	0.22	1.38	1.44	332.09	39.43	333.82	1	1.14	0.13	206.1	2048
5	8	22	0	0	0.36	1.38	1.44	318.1	47.3	319.09	1	1.13	0.12	207.9	2048
5	8	22	15	0	0.58	1.36	1.44	299.08	50.55	302.78	0.99	1.13	0.14	232.2	2048
5	8	22	30	0	0.45	1.38	1.44	318.52	53.32	319.83	1	1.13	0.1	196.8	2048
5	8	22	45	0	0.5	1.37	1.44	296.46	59.65	301.31	0.98	1.12	0.08	221.4	2048
5	8	23	0	0	0.59	1.4	1.49	281.74	66	285.85	0.98	1.13	0.09	262.3	2048
5	8	23	15	0	0.4	1.38	1.44	312.57	38.18	314.84	0.99	1.12	0.14	215	2048
5	8	23	30	0	0.28	1.38	1.44	304.63	39.05	306.47	0.99	1.12	0.13	206.8	2048
5	8	23	45	0	0.44	1.37	1.44	301.76	44.61	302.57	1	1.11	0.09	199.3	2048
5	9	0	0	0	0.29	1.37	1.44	317.88	53.33	319.14	1	1.11	0.05	200.3	2048
5	9	0	15	0	0.28	1.38	1.44	319.98	47.92	320.59	1	1.1	0.09	203	2048
5	9	0	30	0	0.29	1.38	1.44	320.9	31.92	322.2	1	1.1	0.08	204.9	2048
5	9	0	45	0	0.25	1.38	1.44	328.84	52.18	327.99	1	1.1	0.09	206.2	2048
5	9	1	0	0	0.43	1.37	1.44	306.5	38.06	310.3	0.99	1.1	0.05	206.1	2048
5	9	1	15	0	0.24	1.38	1.44	311.82	43.17	311.93	1	1.1	0.05	207.7	2048
5	9	1	30	0	0.29	1.36	1.43	315.93	39.47	316.85	1	1.09	0.04	196.8	2048
5	9	1	45	0	0.46	1.37	1.44	306.18	51.36	305.35	1	1.09	0.06	203.2	2048
5	9	2	0	0	0.24	1.37	1.44	314.42	34.07	315.54	1	1.09	0.09	215.4	2048
5	9	2	15	0	0.42	1.36	1.43	306.77	43.7	307.87	1	1.09	0.08	203.6	2048
5	9	2	30	0	0.29	1.36	1.43	310.91	54.84	311.83	1	1.08	0.07	213.7	2048
5	9	2	45	0	0.34	1.37	1.44	295.23	57.49	295.5	1	1.09	0.1	222.6	2048
5	9	3	0	0	0.23	1.38	1.44	313.45	34.82	313.58	1	1.09	0.12	212.3	2050
5	9	3	15	0	0.45	1.37	1.44	328.33	55.81	328.85	0.98	1.1	0.07	214.7	2048
5	9	3	30	0	0.51	1.38	1.44	294.79	63.65	297.67	0.99	1.1	0.07	186.9	2048
5	9	3	45	0	0.26	1.37	1.44	305.93	46.54	307.47	1	1.1	0.11	214.4	2048
5	9	4	0	0	0.29	1.37	1.44	307.98	47.07	309.43	1	1.11	0.12	207.7	2048
5	9	4	15	0	0.29	1.38	1.44	316.7	36.19	318.92	0.99	1.12	0.11	204.5	2048
5	9	4	30	0	0.4	1.39	1.47	297.5	50.18	297.88	1	1.12	0.09	230.4	2048
5	9	4	45	0	0.27	1.37	1.44	297.34	51.26	300.57	0.99	1.12	0.1	210.5	2048
5	9	5	0	0	0.3	1.37	1.44	294.34	32.84	295.42	1	1.12	0.11	212.9	2048
5	9	5	15	0	0.19	1.37	1.44	308.38	34.56	309.95	1	1.12	0.13	217.7	2050
5	9	5	30	0	0.32	1.37	1.44	299.99	42.1	302.43	0.99	1.12	0.08	208.8	2048
5	9	5	45	0	0.34	1.39	1.47	301.44	38.39	300.52	1	1.12	0.08	216.4	2048
5	9	6	0	0	0.18	1.38	1.45	323.91	31.06	324.49	1	1.12	0.1	216.8	2050
5	9	6	15	0	0.25	1.37	1.44	340.55	41.01	341.38	1	1.14	0.06	209.9	2048
5	9	6	30	0	0.26	1.39	1.47	324.99	51.58	324.08	1	1.14	0.05	206.7	2048
5	9	6	45	0	0.19	1.39	1.47	320.64	45.06	320.48	1	1.15	0.08	208.2	2050
5	9	7	0	0	0.22	1.39	1.47	315.13	44.57	314.69	1	1.14	0.08	205.8	2048
5	9	7	15	0	0.27	1.39	1.47	307.98	35.43	307.53	1	1.15	0.08	212.4	2048
5	9	7	30	0	0.29	1.39	1.47	312.13	38.9	312.26	1	1.15	0.07	211.6	2048
5	9	7	45	0	0.25	1.39	1.47	323.22	32.26	323.81	1	1.16	0.07	215.8	2048
5	9	8	0	0	0.34	1.39	1.47	320.72	32.49	320.85	1	1.16	0.04	214.8	2048
5	9	8	15	0	0.21	1.39	1.47	300.98	38.29	300.68	1	1.17	0.08	207.6	2050
5	9	8	30	0	0.18	1.39	1.47	315.66	38.75	316.12	1	1.18	0.07	214.1	2050
5	9	8	45	0	0.23	1.39	1.47	313.2	35.3	312.63	1	1.18	0.07	215.1	2050
5	9	9	0	0	0.18	1.4	1.49	321.4	38.09	320.43	1	1.19	0.07	210.9	2050
5	9	9	15	0	0.29	1.4	1.49	301.98	32.26	301.53	1	1.19	0.08	213.7	2048
5	9	9	30	0	0.24	1.4	1.49	315.32	37.86	314.61	1	1.19	0.11	211.9	2048
5	9	9	45	0	0.16	1.41	1.49	323.04	46.37	323.02	1	1.2	0.1	211.1	2050
5	9	10	0	0	0.19	1.41	1.49	334.8	47.87	334.08	0.99	1.21	0.11	209.9	2050
5	9	10	15	0	0.39	1.4	1.49	310.34	46.01	311.07	1	1.21	0.11	218.4	2048
5	9	10	30	0	0.2	1.41	1.49	335.16	41.02	335.36	1	1.22	0.14	211.7	2050
5	9	10	45	0	0.12	1.41	1.49	325.15	44.44	326.34	1	1.21	0.1	211.8	2050
5	9	11	0	0	0.29	1.4	1.49	321.9	48.46	321.76	1	1.2	0.08	201.6	2048
5	9	11	15	0	0.14	1.41	1.49	307.41	43.97	307.83	0.99	1.21	0.12	202	2050
5	9	11	30	0	0.12	1.41	1.49	309.03	52	309.81	0.99	1.21	0.11	210.6	2050
5	9	11	45	0	0.22	1.4	1.49	320.17	43.73	318.89	0.99	1.2	0.09	207.7	2050
5	9	12	0	0	0.21	1.41	1.49	309.66	43.07	311.55	0.99	1.21	0.1	214.6	2050
5	9	12	15	0	0.31	1.4	1.49	316.88	48.5	319.28	1	1.2	0.06	205.4	2048
5	9	12	30	0	0.26	1.4	1.49	312.93	29.75	312.56	1	1.21	0.09	207.4	2050
5	9	12	45	0	0.36	1.41	1.51	304.18	51.58	302.45	1	1.21	0.06	248.7	2048
5	9	13	0	0	0.24	1.4	1.49	321	41.35	319.47	1	1.21	0.06	197.4	2048
5	9	13	15	0	0.43	1.4	1.49	297.97	58.13	301.06	0.94	1.23	0.04	244	2048
5	9	13	30	0	0.23	1.41	1.51	309.75	33.65	309.8	1	1.24	0.07	205.5	2050
5	9	13	45	0	0.35	1.41	1.51	301.58	26.12	301.53	1	1.24	0.1	212.5	2048
5	9	14	0	0	0.22	1.42	1.51	328.03	38.6	328.16	1	1.26	0.09	211.2	2050
5	9	14	15	0	0.22	1.42	1.51	310.7	46.58	312.05	1	1.25	0.09	202	2050
5	9	14	30	0	0.37	1.41	1.51	303.48	39.95	303.53	1	1.25	0.06	215.8	2048
5	9	14	45	0	0.41	1.41	1.51	300.94	28.4	302.07	1	1.25	0.1	216.2	2048
5	9	15	0	0	0.48	1.42	1.53	279.55	59.1	280.55	1	1.24	0.05	274.9	2048
5	9	15	15	0	0.27	1.43	1.51	328.45	49.76	329.23	1	1.24	0.07	201.2	2048
5	9	15	30	0	0.21	1.41	1.51	298.2	33.84	298.72	1	1.24	0.1	207.9	2050
5	9	15	45	0	0.57	1.41	1.51	287.03	60.15	288.71	0.98	1.23	0.06	270.7	2048
5	9	16	0	0	0.29	1.4	1.49	307.46	36.97	308.21	1	1.23	0.11	213.3	2048
5	9	16	15	0	0.22	1.4	1.49	311.42	37.48	312.75	1	1.23	0.09	206.2	2048
5	9	16	30	0	0.26	1.4	1.49	326.96	30.19	327.7	1	1.23	0.11	208.3	2048
5	9	16	45	0	0.22	1.41	1.49	324.29	39.7	324.5	1	1.23	0.12	214.1	2050
5	9	17	0	0	0.25	1.41	1.49	309.49	39.87	312.13	0.98	1.22	0.13	212.2	2050
5	9	17	15	0	0.31	1.4	1.49	324.75	28.99	325.32	1	1.24	0.11	215.2	2048
5	9	17	30	0	0.26	1.4	1.49	307.09	35.57	307.05	1	1.22	0.09	211.6	2050
5	9	17	45	0	0.22	1.4	1.49	321.93	42.16	322.93	0.99	1.22	0.08	217.8	2050
5	9	18	0	0	0.27	1.4	1.49	313.73	61	314.17	1	1.22	0.11	209	2048
5	9	18	15	0	0.22	1.41	1.49	301.31	35.49	301.38	1	1.23	0.08	199.2	2050
5	9	18	30	0	0.16	1.4	1.49	326.34	41.72	327.08	1	1.22	0.07	210.9	2050
5	9	18	45	0	0.16	1.41	1.49	314.35	53.41	315.37	0.99	1.21	0.13	212.7	2050
5	9	19	0	0	0.22	1.41	1.49	311.1	34.85	312.42	0.99	1.21	0.16	213	2050
5	9	19	15	0	0.23	1.4	1.49	309.47	33.51	310.47	1	1.23	0.13	206.7	2048
5	9	19	30	0	0.43	1.4	1.49	323.37	53.93	322.8	1	1.21	0.03	175.8	2048
5	9	19	45	0	0.22	1.41	1.49	320.45	35.04	321.18	1	1.21	0.13	206.4	2048
5	9	20	0	0	0.3	1.4	1.49	329.51	32.5	329.53	1	1.21	0.09	216.3	2048
5	9	20	15	0	0.21	1.4	1.49	316.66	42.14	316.3	1	1.21	0.05	220	2050
5	9	20	30	0	0.17	1.41	1.49	322.91	38.83	323.29	1	1.19	0.08	204.2	2050
5	9	20	45	0	0.16	1.42	1.49	323.76	47.21	322.25	0.99	1.19	0.04	199.8	2050
5	9	21	0	0	0.19	1.41	1.49	329.98	40.24	330.58	1	1.19	0.05	208.7	2050
5	9	21	15	0	0.23	1.4	1.49	308.06	51.19	306.87	1	1.19	0.07	215.3	2050
5	9	21	30	0	0.22	1.41	1.49	313.85	32.66	316.22	0.99	1.19	0.07	204.6	2048
5	9	21	45	0	0.18	1.41	1.49	323.16	40.06	324.34	0.99	1.19	0.08	204.8	2050
5	9	22	0	0	0.24	1.39	1.47	320.75	33.12	321.57	1	1.18	0.09	209.2	2050
5	9	22	15	0	0.16	1.39	1.47	322.88	45.64	323.15	1	1.18	0.07	210.3	2050
5	9	22	30	0	0.26	1.39	1.47	317.64	32.86	319.09	1	1.18	0.07	194.1	2048
5	9	22	45	0	0.23	1.39	1.47	313.06	34.24	314.9	0.99	1.17	0.08	212.1	2050
5	9	23	0	0	0.14	1.39	1.47	328.27	38.41	329.68	1	1.18	0.07	208.9	2050
5	9	23	15	0	0.15	1.4	1.47	319.43	44.64	319.8	0.98	1.17	0.1	215.2	2050
5	9	23	30	0	0.15	1.4	1.47	327.34	38.19	328.53	1	1.17	0.13	210.3	2050
5	9	23	45	0	0.23	1.4	1.47	314.98	46.52	315.57	0.99	1.16	0.1	212.9	2050
11	5	0	0	0	0.22	1.4	1.47	322.75	29.29	322.95	1	1.15	0.1	210	2050
11	5	0	15	0	0.19	1.4	1.47	331.79	42.47	331.8	0.99	1.15	0.11	208.4	2050
11	5	0	30	0	0.17	1.39	1.47	322.41	49.72	321.75	1	1.17	0.08	217.9	2050
11	5	0	45	0	0.24	1.39	1.47	313.75	29.09	313.74	1	1.16	0.06	212	2048
11	5	1	0	0	0.12	1.39	1.47	310.79	42.67	311.82	1	1.15	0.02	218.6	2050
11	5	1	15	0	0.17	1.39	1.47	306.08	37.42	306.7	1	1.14	0.02	217.1	2050
11	5	1	30	0	0.23	1.39	1.47	311.18	23.11	310.86	1	1.14	0.02	263.2	2050
11	5	1	45	0	0.19	1.38	1.47	305.2	27.16	306.58	1	1.14	0.01	341.8	2050
11	5	2	0	0	0.11	1.36	1.44	286.52	41.88	287.76	1	1.12	0.01	220.9	2050
11	5	2	15	0	0.12	1.37	1.44	321.34	28.65	321.99	1	1.12	0.02	191.8	2050
11	5	2	30	0	0.08	1.39	1.47	306.37	51.23	306.12	1	1.14	0.02	227.6	2050
11	5	2	45	0	0.07	1.36	1.44	308.1	39.67	308.77	1	1.13	0.03	201.6	2050
11	5	3	0	0	0.1	1.37	1.44	307.05	38.1	308.35	1	1.13	0.04	201.8	2050
11	5	3	15	0	0.07	1.38	1.45	348.93	51.59	349.19	0.98	1.14	0.07	208.3	2050
11	5	3	30	0	0.09	1.39	1.47	331.39	40.79	329.4	1	1.14	0.09	216	2050
11	5	3	45	0	0.09	1.4	1.47	332.18	44.3	331.02	1	1.14	0.09	212.3	2050
11	5	4	0	0	0.09	1.4	1.47	343.52	47.89	342.24	1	1.14	0.1	217.9	2050
11	5	4	15	0	0.09	1.39	1.47	328.63	41.95	327.17	1	1.16	0.09	219.4	2050
11	5	4	30	0	0.09	1.4	1.47	336.77	50.6	335.65	1	1.16	0.11	214.9	2050
11	5	4	45	0	0.1	1.39	1.47	336.12	32.78	335.92	0.99	1.16	0.09	209	2050
11	5	5	0	0	0.06	1.39	1.47	12.01	47.46	12.01	1	1.17	0.09	213.8	2050
11	5	5	15	0	0.07	1.39	1.47	341.29	41.7	343.06	1	1.17	0.09	208.3	2050
11	5	5	30	0	0.07	1.39	1.47	0.15	48.03	0.41	1	1.18	0.06	210.6	2050
11	5	5	45	0	0.14	1.39	1.47	328.58	40.3	327.71	1	1.18	0.05	196.9	2050
11	5	6	0	0	0.12	1.4	1.49	310.14	46.11	310.21	1	1.19	0.08	213.2	2050
11	5	6	15	0	0.12	1.38	1.47	323.39	51.81	321.75	1	1.19	0.06	206.4	2050
11	5	6	30	0	0.15	1.41	1.49	326.32	38.76	325.56	1	1.19	0.06	210.7	2050
11	5	6	45	0	0.1	1.4	1.49	314.23	47.68	313.46	1	1.19	0.07	204.1	2050
11	5	7	0	0	0.24	1.4	1.49	316.27	27.69	316.22	1	1.2	0.06	205.1	2050
11	5	7	15	0	0.13	1.4	1.49	304.69	45.51	305.24	1	1.2	0.05	206.7	2050
11	5	7	30	0	0.16	1.4	1.49	317.94	31.55	317.56	1	1.21	0.04	206.9	2050
11	5	7	45	0	0.16	1.4	1.49	317.35	34.83	317.07	1	1.22	0.05	219.8	2050
11	5	8	0	0	0.17	1.39	1.49	296.06	43.64	295.35	1	1.22	0.06	201.4	2050
11	5	8	15	0	0.12	1.4	1.49	338.56	40.98	338.97	1	1.23	0.07	205	2050
11	5	8	30	0	0.25	1.39	1.49	311.11	24.35	311.19	1	1.23	0.06	208.9	2050
11	5	8	45	0	0.18	1.4	1.49	323.16	33.2	323.19	1	1.24	0.07	212.7	2050
11	5	9	0	0	0.17	1.41	1.51	301.91	33.85	301.94	1	1.24	0.05	213.8	2050
11	5	9	15	0	0.21	1.41	1.51	307.28	29.66	307.28	1	1.25	0.06	206	2050
11	5	9	30	0	0.1	1.42	1.51	358.97	43.41	359.13	1	1.26	0.06	209.3	2050
11	5	9	45	0	0.15	1.41	1.51	318.28	27.78	318.24	1	1.26	0.06	217.5	2050
11	5	10	0	0	0.08	1.4	1.51	307.8	55.28	307.34	1	1.26	0.03	213.4	2050
11	5	10	15	0	0.13	1.41	1.51	311.86	44.26	310.9	1	1.27	0.02	211.6	2050
11	5	10	30	0	0.04	1.29	1.23	37.53	71.89	25.6	0.89	0.67	0.03	185.7	2051
11	5	10	45	0	0.05	1.26	1.22	11.07	78	356.98	0.96	0.65	0.03	110.8	2051
11	5	11	0	0	0.04	1.3	1.23	274.75	72.17	273.13	0.92	0.67	0.06	117.9	2051
11	5	11	15	0	0.03	1.3	1.23	335.38	77.13	329.96	0.94	0.68	0.02	90.7	2051
11	5	11	30	0	0.03	1.29	1.23	74.13	71.64	75.58	0.99	0.68	0.13	190	2051
11	5	11	45	0	0.04	1.3	1.25	233.42	74.79	241.22	0.91	0.68	0.04	192	2051
11	5	12	0	0	0.04	1.28	1.25	180.17	76.84	154.4	0.74	0.67	0.03	90	2051
11	5	12	15	0	0.03	1.26	1.22	235.26	74.87	231.67	0.86	0.65	0.03	330.1	2051
11	5	12	30	0	0.03	1.26	1.23	300.49	75.97	275.99	0.9	0.65	0.02	350.4	2051
11	5	12	45	0	0.02	1.26	1.22	96.76	74.33	103.65	0.71	0.65	0.02	7.8	2051
11	5	13	0	0	0.03	1.25	1.22	187.92	78.37	157.49	0.82	0.64	0.03	283.2	2051
11	5	13	15	0	0.02	1.26	1.22	75.55	76.11	89.13	0.92	0.64	0.02	279.3	2051
11	5	13	30	0	0.02	1.26	1.22	155.35	68.01	153.11	0.98	0.64	0.02	76.7	2051
11	5	13	45	0	0.03	1.29	1.2	256.53	76.21	238.9	0.98	0.63	0.01	8	2051
11	5	14	0	0	0.03	1.24	1.2	31.04	69.78	36.94	0.94	0.62	0.02	140	2051
11	5	14	15	0	0.02	1.28	1.2	195.45	75.47	186.6	0.99	0.63	0.08	9.9	2051
11	5	14	30	0	0.03	1.28	1.2	324.16	64.68	329.72	0.84	0.62	0.02	204.8	2051
11	5	14	45	0	0.03	1.31	1.25	157.93	78.24	259.77	0.27	0.62	0.08	298.6	2051
				Average	0.255377	1.38473	1.45753	301.621	43.0924	303.295	0.989486	1.14051	0.0783904	208.3
				Minimum	0.02	1.24	1.2	0.15	22.37	0.41	0.27	0.62	0.01	7.8
				Maximum	0.59	1.43	1.53	358.97	78.37	359.13	1	1.27	0.16	350.4
				Median	0.255	1.39	1.47	310.91	40.88	311.68	1	1.17	0.08	210.15

## Sheet: Sheet3
	wave height (m)			mean period (s)			current spend (m/s)
	leeward	windward		leeward	windward		leeward	windward
statistic	wave height (m)			mean period (s)			current spend (m/s)
median	0.18	0.255		1.31	1.47		0.04	0.08
q1	0.15	0.18		1.3	1.44		0.03	0.06
min	0.01	0.02		1.05	1.2		0.01	0.01
max	0.35	0.59		1.37	1.53		0.08	0.16
q3	0.22	0.32		1.33	1.49		0.06	0.1
mean	0.178322	0.255377		1.29863	1.45753		0.0442466	0.0783904
St dev	0.063589	0.118859		0.0623606	0.0643291		0.0165114	0.0303215
